# Supplementary material for: Sesquiterpenoids isolated from an endophyte fungus Diaporthe sp.
Source: Royal Society of Chemistry journal article supplement (doi:10.1039/c4ra13136c), 2015-01-01
Supplement: c4ra13136c1.pdf [file c4ra13136c1.pdf]

## Supporting Information

# Sesquiterpenoids Isolated from an Endophyte Fungus *Diaporthe* sp.

Chao-Jun Chen,<sup>a</sup> Xian-Xian Liu,<sup>a</sup> Wen-Jing Zhang,<sup>a</sup> Le-Yun Zang,<sup>a</sup> Gang  
Wang,<sup>a</sup> Seik Weng Ng,<sup>b</sup> Ren-Xiang Tan<sup>\* a</sup> and Hui-Ming Ge<sup>\* a</sup>

<sup>a</sup>Institute of Functional Biomolecules, State Key Laboratory of Pharmaceutical  
Biotechnology, Nanjing University, Nanjing 210093, China

<sup>b</sup>Department of Chemistry, University of Malaya, Kuala Lumpur 50603, Malaysia

### Correspondence

Profs. Hui Ming Ge and Ren Xiang Tan, Institute of Functional Biomolecules, State  
Key Laboratory of Pharmaceutical Biotechnology, Nanjing University, 22 Hankou  
Road, Nanjing 210093, China. Email: hmge@nju.edu.cn, rxtan@nju.edu.cn

**Fig. 1S**  $^1\text{H}$  NMR spectrum of compound **1** in  $\text{CDCl}_3$  at 400 MHz  
**Fig. 2S**  $^{13}\text{C}$  NMR spectrum of compound **1** in  $\text{CDCl}_3$  at 100 MHz  
**Fig. 3S**  $^1\text{H}$ - $^1\text{H}$  COSY spectrum of compound **1** in  $\text{CDCl}_3$  at 400 MHz  
**Fig. 4S** HMQC spectrum of compound **1** in  $\text{CDCl}_3$  at 400 MHz  
**Fig. 5S** HMBC spectrum of compound **1** in  $\text{CDCl}_3$  at 400 MHz  
**Fig. 6S**  $^1\text{H}$  NMR spectrum of compound **2** in  $\text{CDCl}_3$  at 400 MHz  
**Fig. 7S**  $^{13}\text{C}$  NMR spectrum of compound **2** in  $\text{CDCl}_3$  at 100 MHz  
**Fig. 8S**  $^1\text{H}$ - $^1\text{H}$  COSY spectrum of compound **2** in  $\text{CDCl}_3$  at 400 MHz  
**Fig. 9S** HMQC spectrum of compound **2** in  $\text{CDCl}_3$  at 400 MHz  
**Fig. 10S** HMBC spectrum of compound **2** in  $\text{CDCl}_3$  at 400 MHz  
**Fig. 11S** NOESY spectrum of compound **2** in  $\text{CDCl}_3$  at 400 MHz  
**Fig. 12S**  $^1\text{H}$  NMR spectrum of compound **3** in  $\text{CDCl}_3$  at 400 MHz  
**Fig. 13S**  $^{13}\text{C}$  NMR spectrum of compound **3** in  $\text{CDCl}_3$  at 100 MHz  
**Fig. 14S**  $^1\text{H}$ - $^1\text{H}$  COSY spectrum of compound **3** in  $\text{CDCl}_3$  at 400 MHz  
**Fig. 15S** HMQC spectrum of compound **3** in  $\text{CDCl}_3$  at 400 MHz  
**Fig. 16S** HMBC spectrum of compound **3** in  $\text{CDCl}_3$  at 400 MHz  
**Fig. 17S** NOESY spectrum of compound **3** in  $\text{CDCl}_3$  at 400 MHz  
**Fig. 18S**  $^1\text{H}$  NMR spectrum of compound **4** in  $\text{CDCl}_3$  at 500 MHz  
**Fig. 19S**  $^{13}\text{C}$  NMR spectrum of compound **4** in  $\text{CDCl}_3$  at 125 MHz  
**Fig. 20S**  $^1\text{H}$ - $^1\text{H}$  COSY spectrum of compound **4** in  $\text{CDCl}_3$  at 500 MHz  
**Fig. 21S** HMQC spectrum of compound **4** in  $\text{CDCl}_3$  at 500 MHz  
**Fig. 22S** HMBC spectrum of compound **4** in  $\text{CDCl}_3$  at 500 MHz  
**Fig. 23S** NOESY spectrum of compound **4** in  $\text{CDCl}_3$  at 500 MHz  
**Fig. 24S**  $^1\text{H}$  NMR spectrum of compound **5** in  $\text{DMSO}-d_6$  at 600 MHz  
**Fig. 25S**  $^{13}\text{C}$  NMR spectrum of compound **5** in  $\text{DMSO}-d_6$  at 150 MHz  
**Fig. 26S**  $^1\text{H}$ - $^1\text{H}$  COSY spectrum of compound **5** in  $\text{DMSO}-d_6$  at 600 MHz  
**Fig. 27S** HMQC spectrum of compound **5** in  $\text{DMSO}-d_6$  at 600 MHz  
**Fig. 28S** HMBC spectrum of compound **5** in  $\text{DMSO}-d_6$  at 600 MHz  
**Fig. 29S** NOESY spectrum of compound **5** in  $\text{DMSO}-d_6$  at 600 MHz  
**Fig. 30S**  $^1\text{H}$  NMR spectrum of compound **6** in acetone- $d_6$  at 400 MHz  
**Fig. 31S**  $^{13}\text{C}$  NMR spectrum of compound **6** in acetone- $d_6$  at 100 MHz  
**Fig. 32S**  $^1\text{H}$ - $^1\text{H}$  COSY spectrum of compound **6** in acetone- $d_6$  at 400 MHz  
**Fig. 33S** HMQC spectrum of compound **6** in acetone- $d_6$  at 400 MHz  
**Fig. 34S** HMBC spectrum of compound **6** in acetone- $d_6$  at 400 MHz  
**Fig. 35S** NOESY spectrum of compound **6** in acetone- $d_6$  at 400 MHz  
**Fig. 36S**  $^1\text{H}$  NMR spectrum of compound **7** in  $\text{CDCl}_3$  at 400 MHz  
**Fig. 37S**  $^{13}\text{C}$  NMR spectrum of compound **7** in  $\text{CDCl}_3$  at 100 MHz  
**Fig. 38S** DEPT spectrum of compound **7** in  $\text{CDCl}_3$  at 100 MHz  
**Fig. 39S**  $^1\text{H}$ - $^1\text{H}$  COSY spectrum of compound **7** in  $\text{CDCl}_3$  at 400 MHz  
**Fig. 40S** HMQC spectrum of compound **7** in  $\text{CDCl}_3$  at 400 MHz  
**Fig. 41S** HMBC spectrum of compound **7** in  $\text{CDCl}_3$  at 400 MHz  
**Fig. 42S** NOESY spectrum of compound **7** in  $\text{CDCl}_3$  at 400 MHz  
**Fig. 43S**  $^1\text{H}$  NMR spectrum of compound **8** in  $\text{CDCl}_3$  at 400 MHz

**Fig. 44S**  $^{13}\text{C}$  NMR spectrum of compound **8** in  $\text{CDCl}_3$  at 100 MHz  
**Fig. 45S**  $^1\text{H}$ - $^1\text{H}$  COSY spectrum of compound **8** in  $\text{CDCl}_3$  at 400 MHz  
**Fig. 46S** HMQC spectrum of compound **8** in  $\text{CDCl}_3$  at 400 MHz  
**Fig. 47S** HMBC spectrum of compound **8** in  $\text{CDCl}_3$  at 400 MHz  
**Fig. 48S** NOESY spectrum of compound **8** in  $\text{CDCl}_3$  at 400 MHz  
**Fig. 49S**  $^1\text{H}$  NMR spectrum of compound **9** in  $\text{CDCl}_3$  at 400 MHz  
**Fig. 50S**  $^{13}\text{C}$  NMR spectrum of compound **9** in  $\text{CDCl}_3$  at 100 MHz  
**Fig. 51S**  $^1\text{H}$ - $^1\text{H}$  COSY spectrum of compound **9** in  $\text{CDCl}_3$  at 400 MHz  
**Fig. 52S** HMQC spectrum of compound **9** in  $\text{CDCl}_3$  at 400 MHz  
**Fig. 53S** HMBC spectrum of compound **9** in  $\text{CDCl}_3$  at 400 MHz  
**Fig. 54S**  $^1\text{H}$  NMR spectrum of compound **10** in  $\text{CDCl}_3$  at 400 MHz  
**Fig. 55S**  $^{13}\text{C}$  NMR spectrum of compound **10** in  $\text{CDCl}_3$  at 100 MHz  
**Fig. 56S**  $^1\text{H}$ - $^1\text{H}$  COSY spectrum of compound **10** in  $\text{CDCl}_3$  at 400 MHz  
**Fig. 57S** HMQC spectrum of compound **10** in  $\text{CDCl}_3$  at 400 MHz  
**Fig. 58S** HMBC spectrum of compound **10** in  $\text{CDCl}_3$  at 400 MHz  
**Fig. 59S** NOESY spectrum of compound **10** in  $\text{CDCl}_3$  at 400 MHz

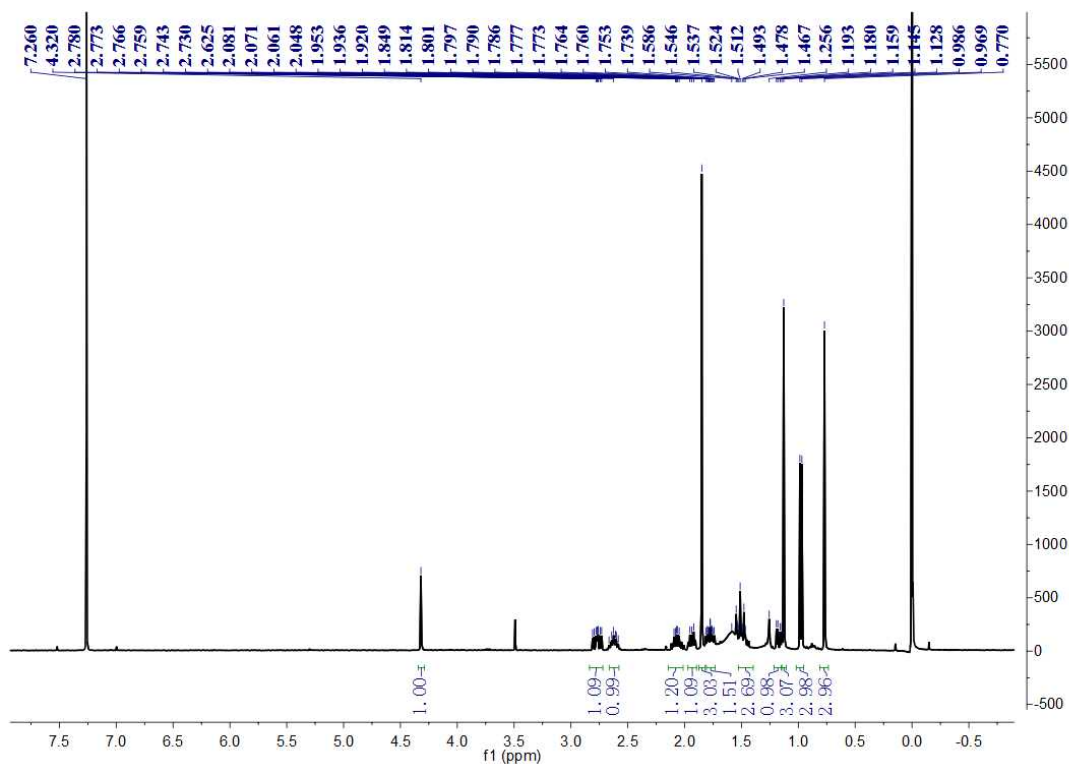

Fig. 1S  $^1\text{H}$  NMR spectrum of compound **1** in  $\text{CDCl}_3$  at 400 MHz

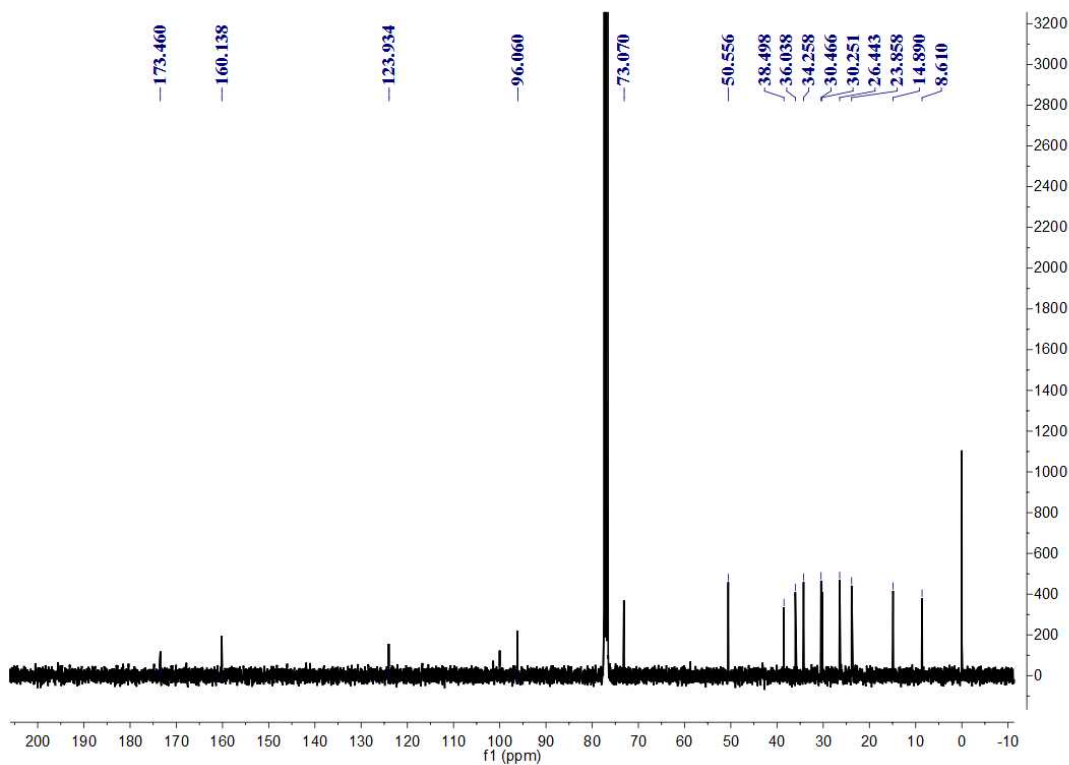

Fig. 2S  $^{13}\text{C}$  NMR spectrum of compound **1** in  $\text{CDCl}_3$  at 100 MHz

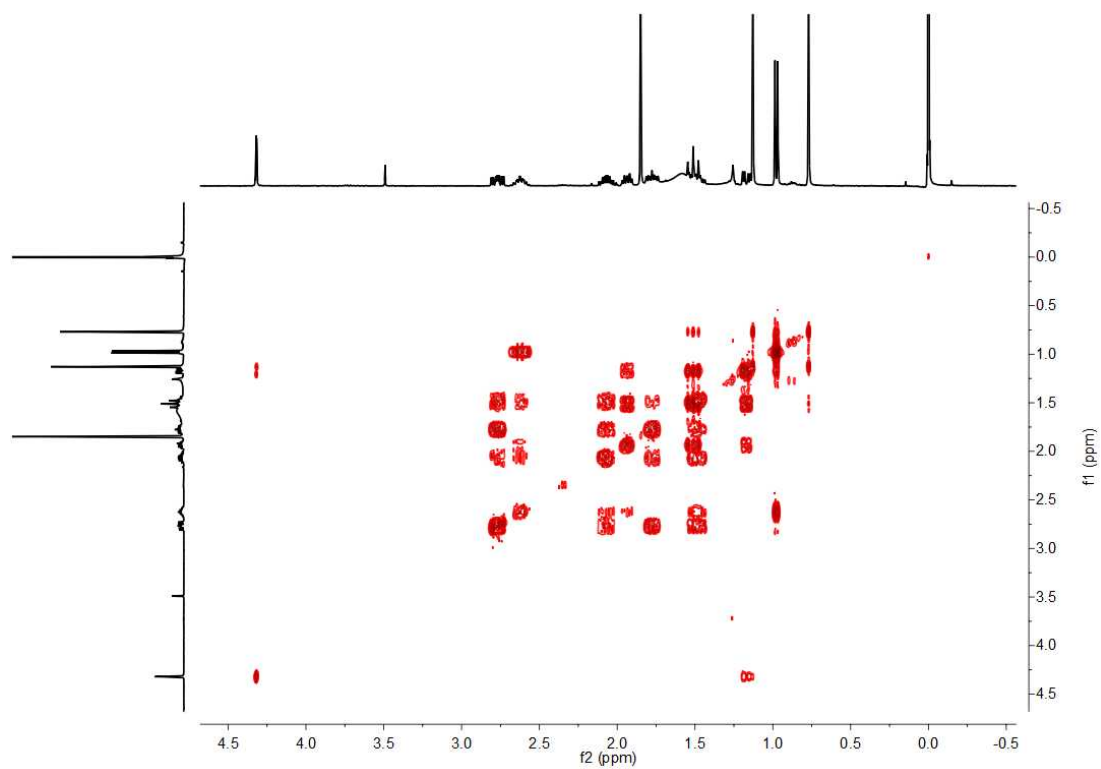

**Fig. 3S**  $^1\text{H}$ - $^1\text{H}$  COSY spectrum of compound **1** in  $\text{CDCl}_3$  at 400 MHz

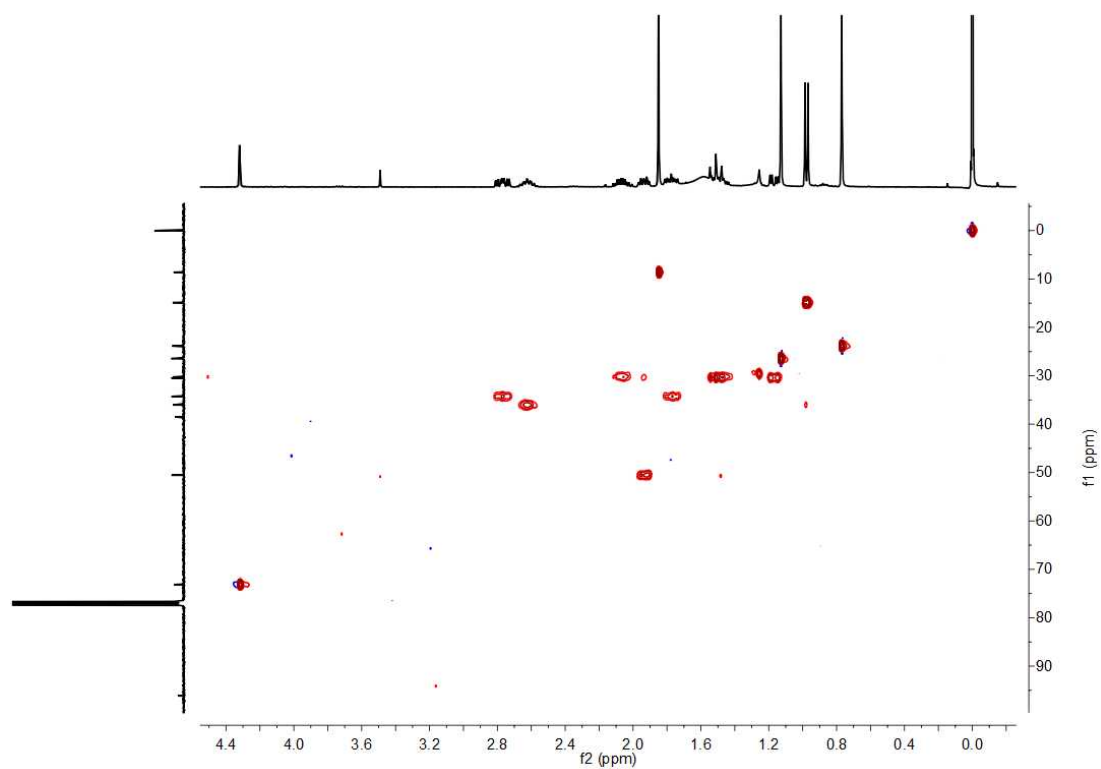

**Fig. 4S** HMQC spectrum of compound **1** in  $\text{CDCl}_3$  at 400 MHz

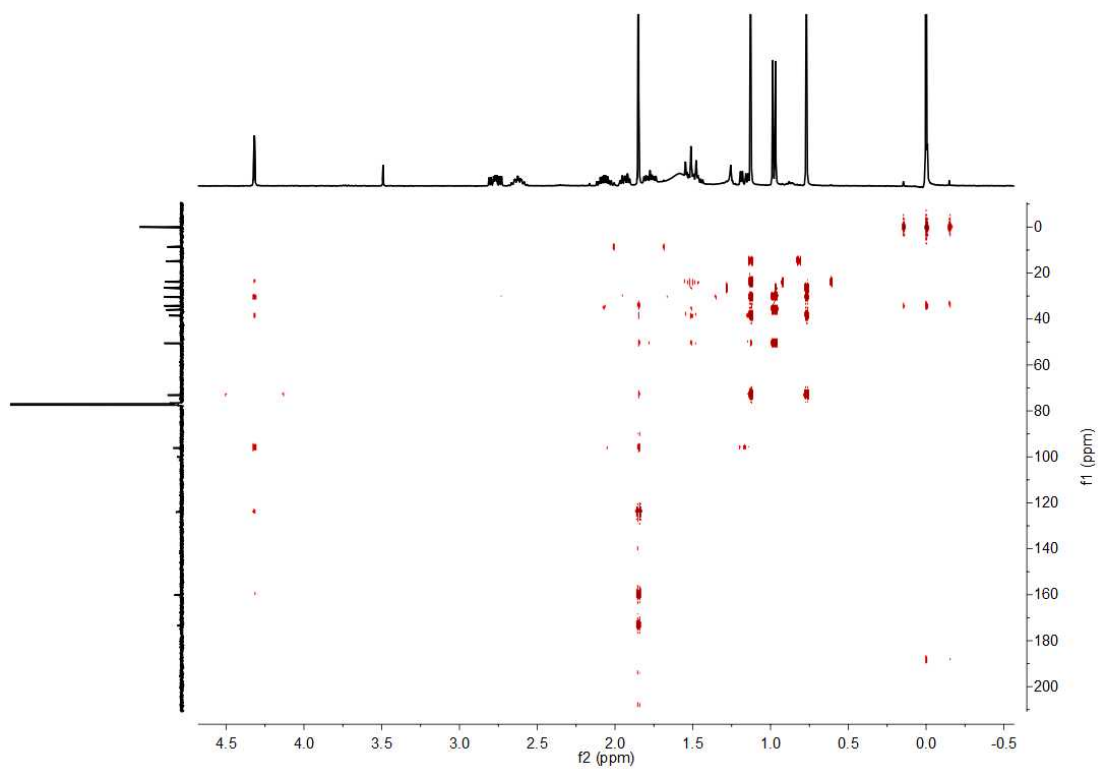

**Fig. 5S** HMBC spectrum of compound **1** in  $\text{CDCl}_3$  at 400 MHz

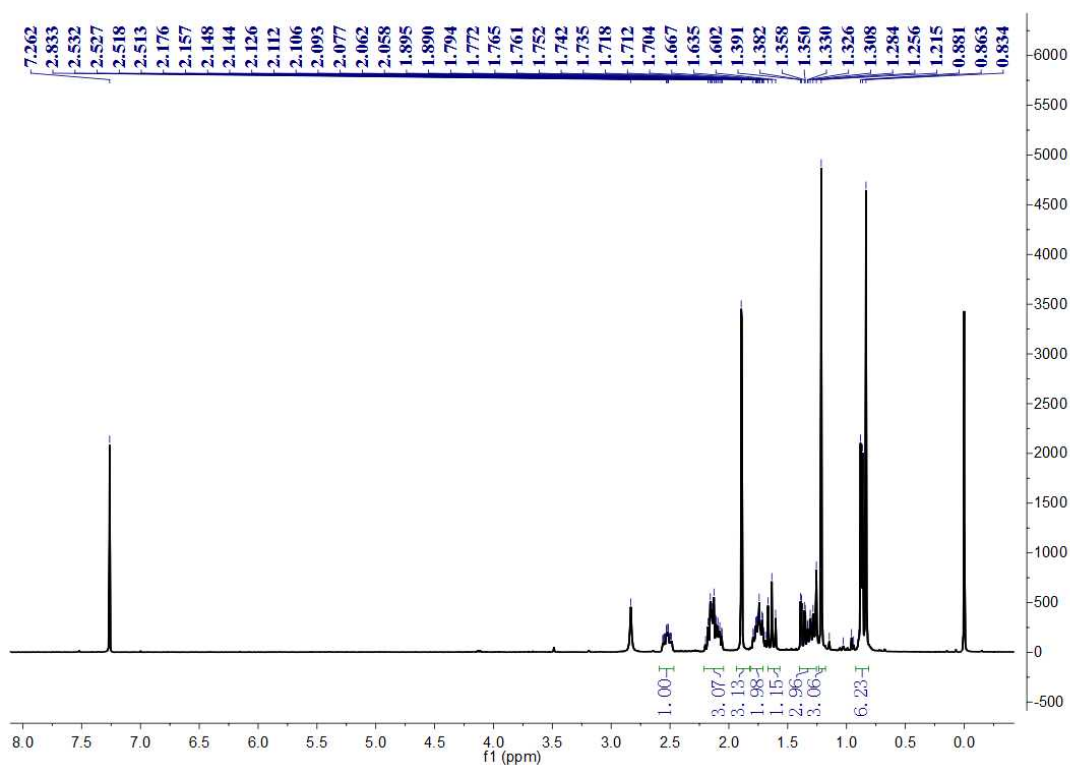

**Fig. 6S**  $^1\text{H}$  NMR spectrum of compound **2** in  $\text{CDCl}_3$  at 400 MHz

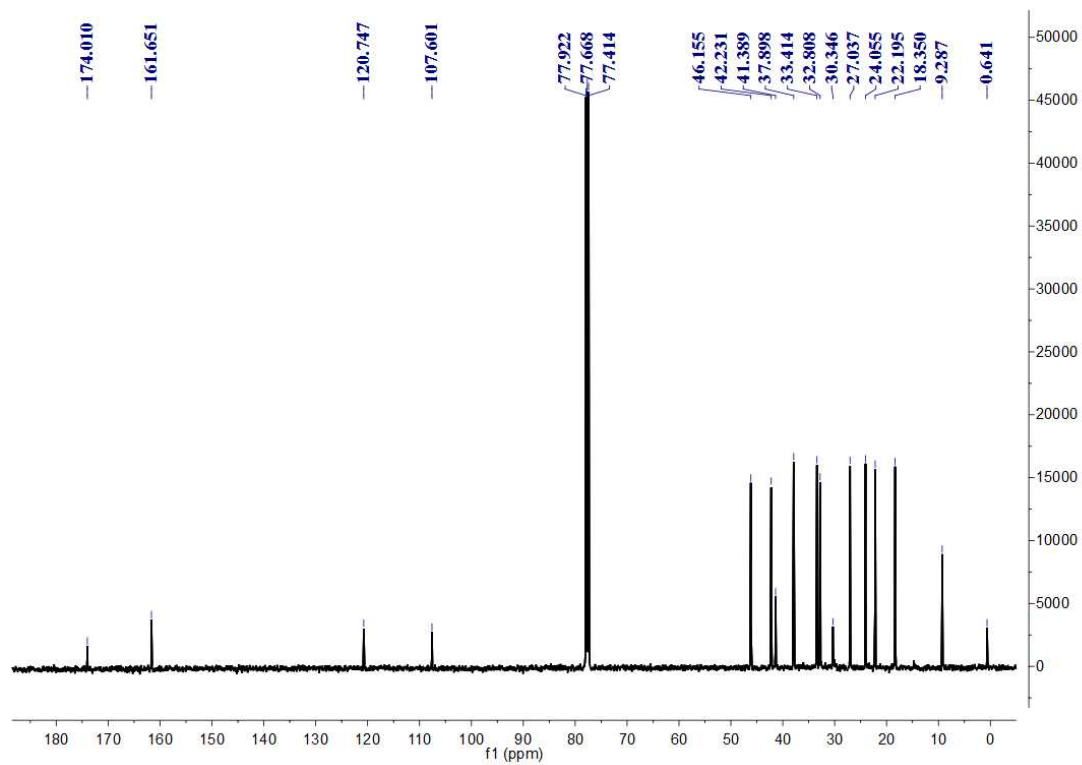

**Fig. 7S**  $^{13}\text{C}$  NMR spectrum of compound **2** in  $\text{CDCl}_3$  at 100 MHz

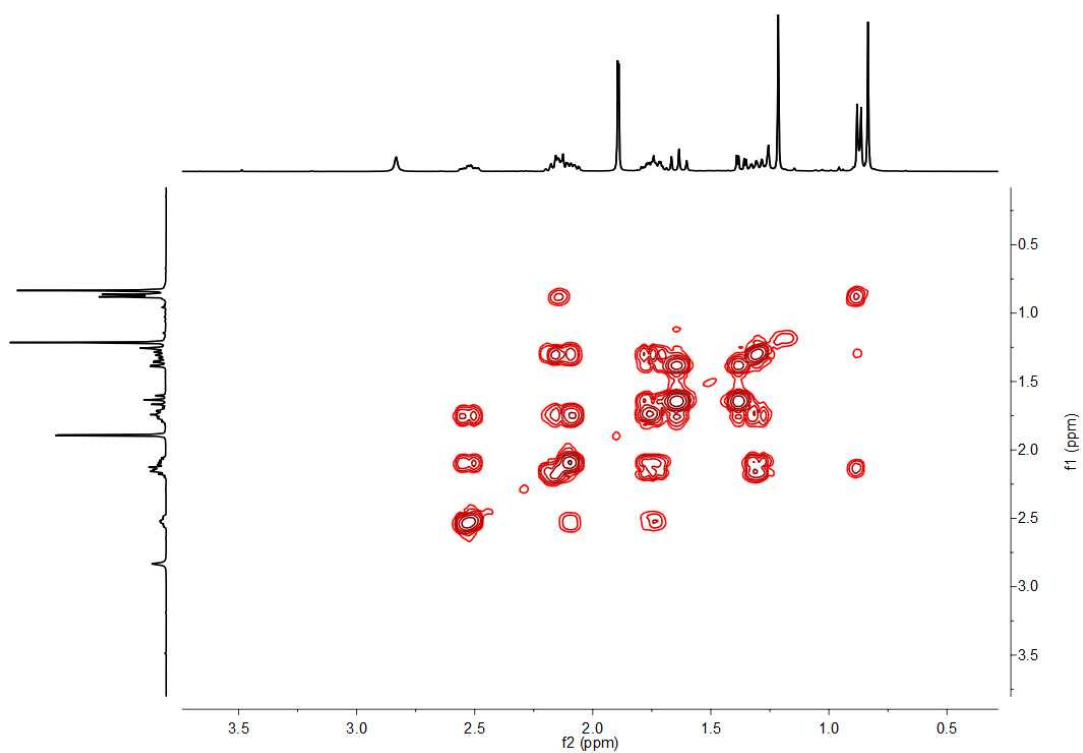

**Fig. 8S**  $^1\text{H}$ - $^1\text{H}$  COSY spectrum of compound **2** in  $\text{CDCl}_3$  at 400 MHz

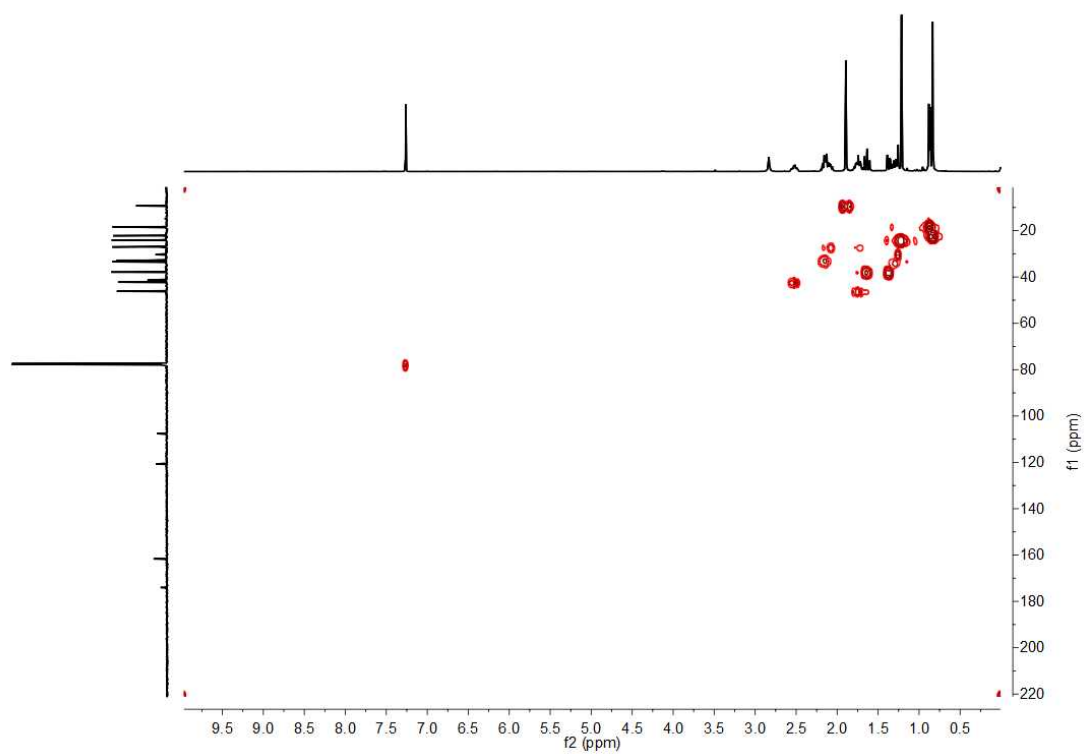

**Fig. 9S** HMQC spectrum of compound **2** in CDCl<sub>3</sub> at 400 MHz

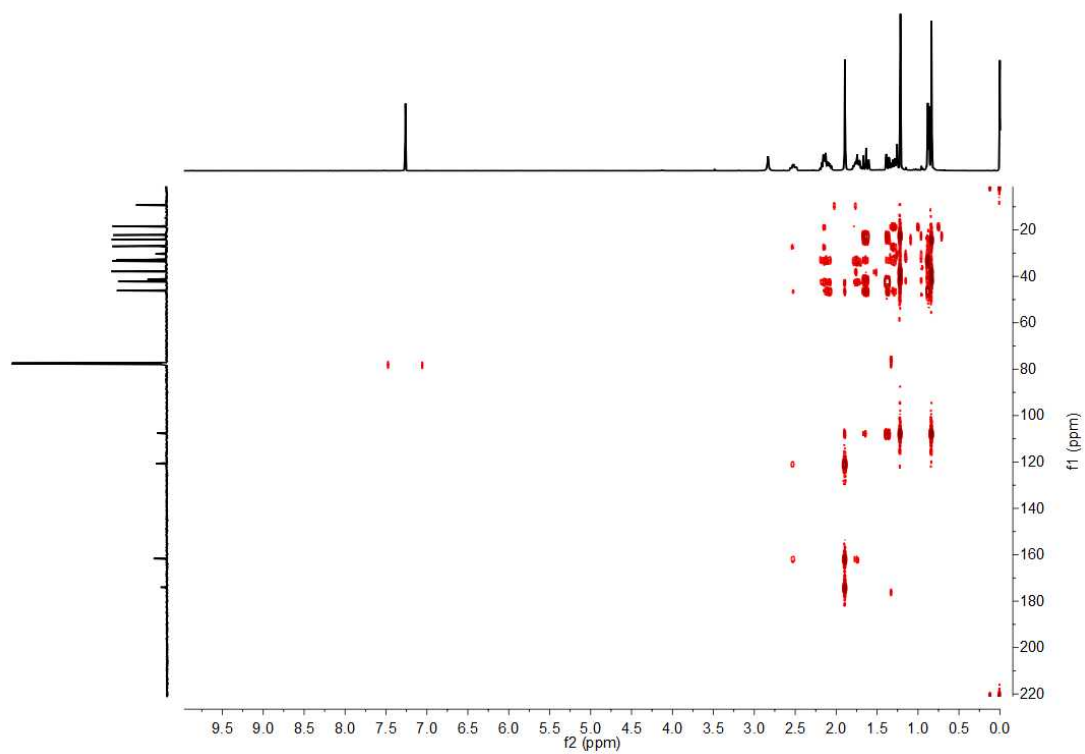

**Fig. 10S** HMBC spectrum of compound **2** in CDCl<sub>3</sub> at 400 MHz



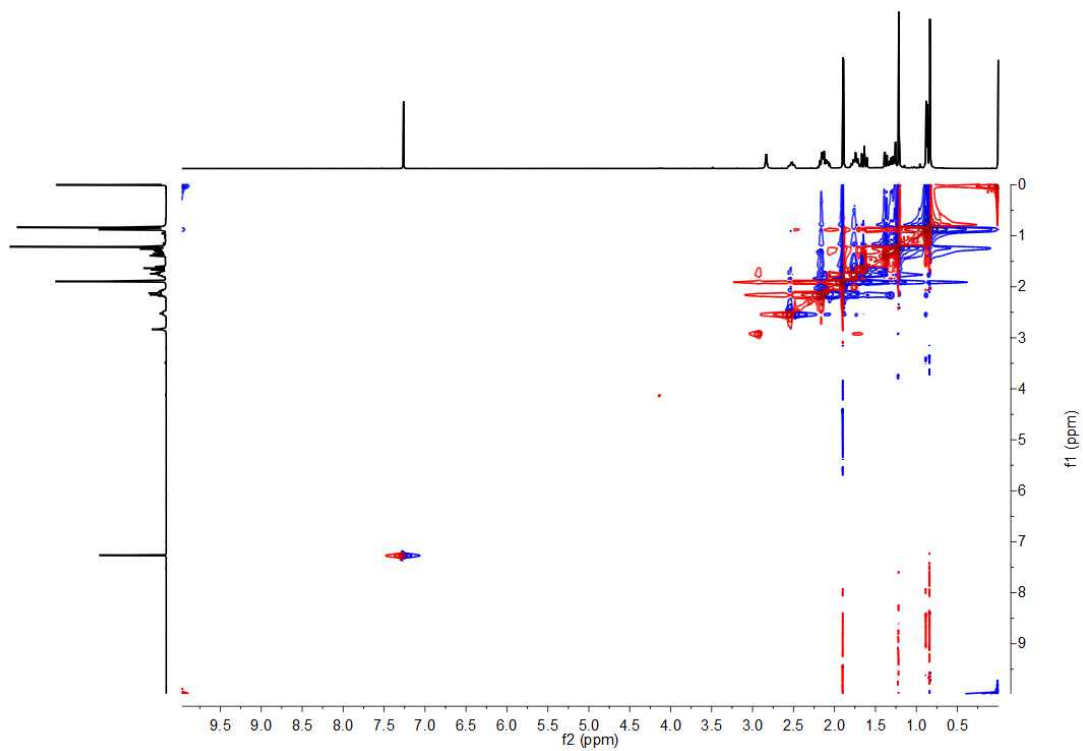

**Fig. 11S** NOESY spectrum of compound **2** in  $\text{CDCl}_3$  at 400 MHz

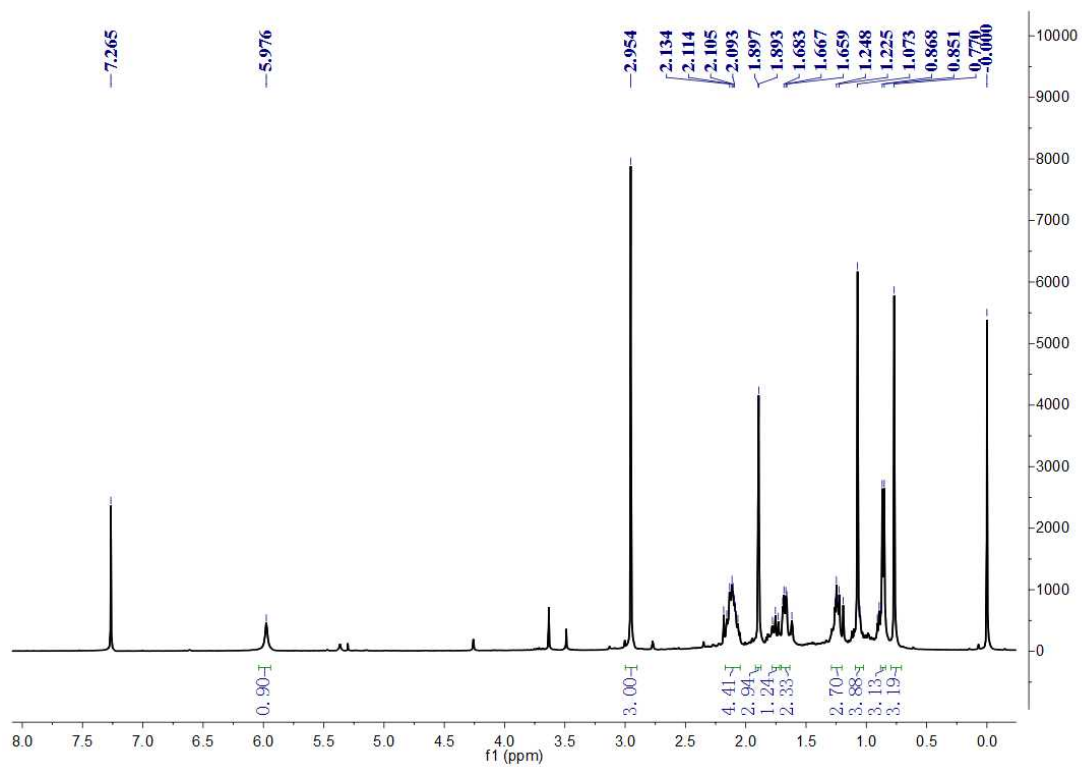

**Fig. 12S**  $^1\text{H}$  NMR spectrum of compound **3** in  $\text{CDCl}_3$  at 400 MHz

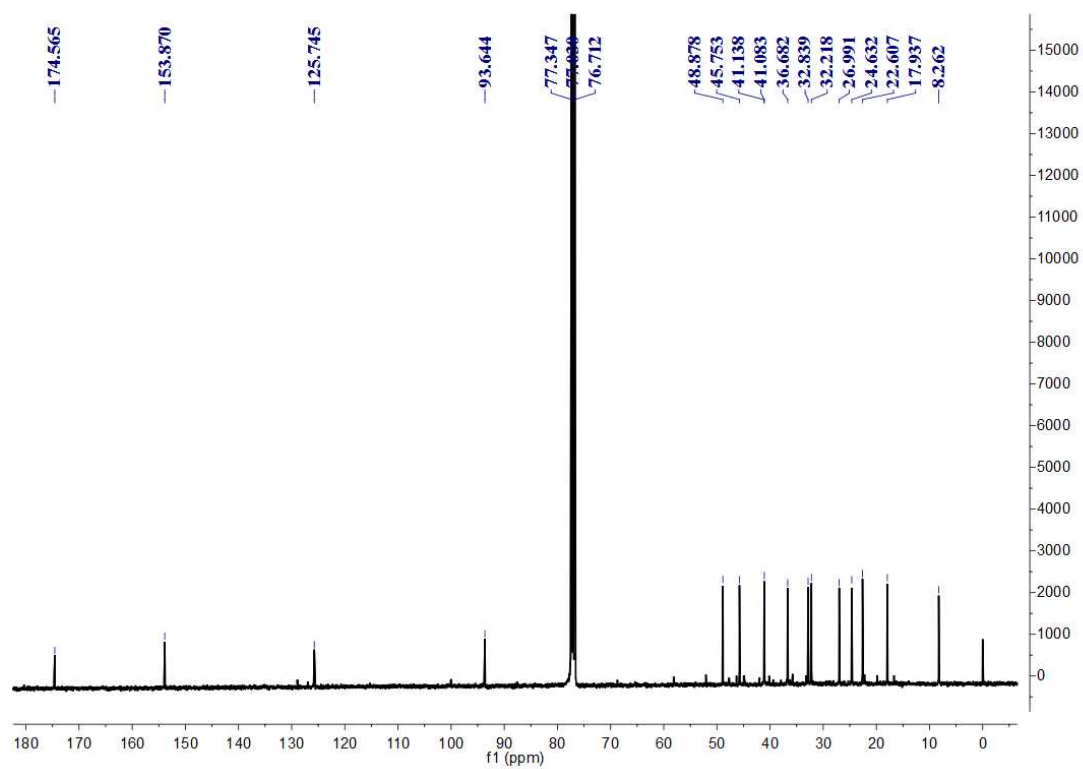

**Fig. 13S**  $^{13}\text{C}$  NMR spectrum of compound **3** in  $\text{CDCl}_3$  at 100 MHz

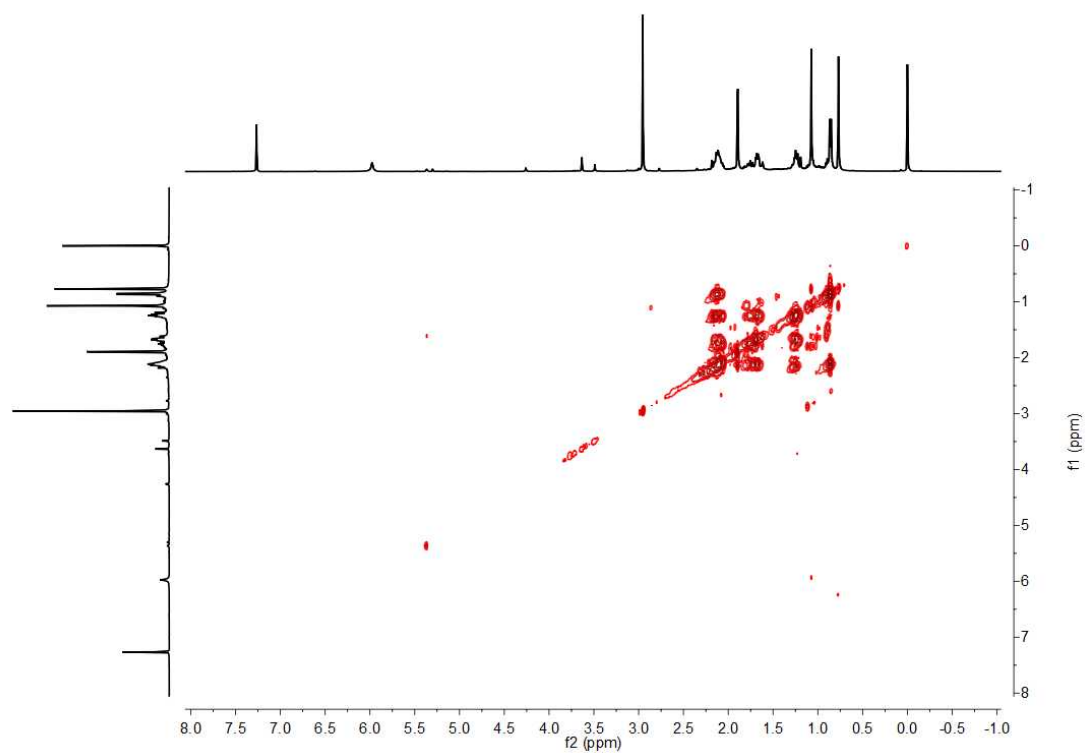

**Fig. 14S**  $^1\text{H}$ - $^1\text{H}$  COSY spectrum of compound **3** in  $\text{CDCl}_3$  at 400 MHz

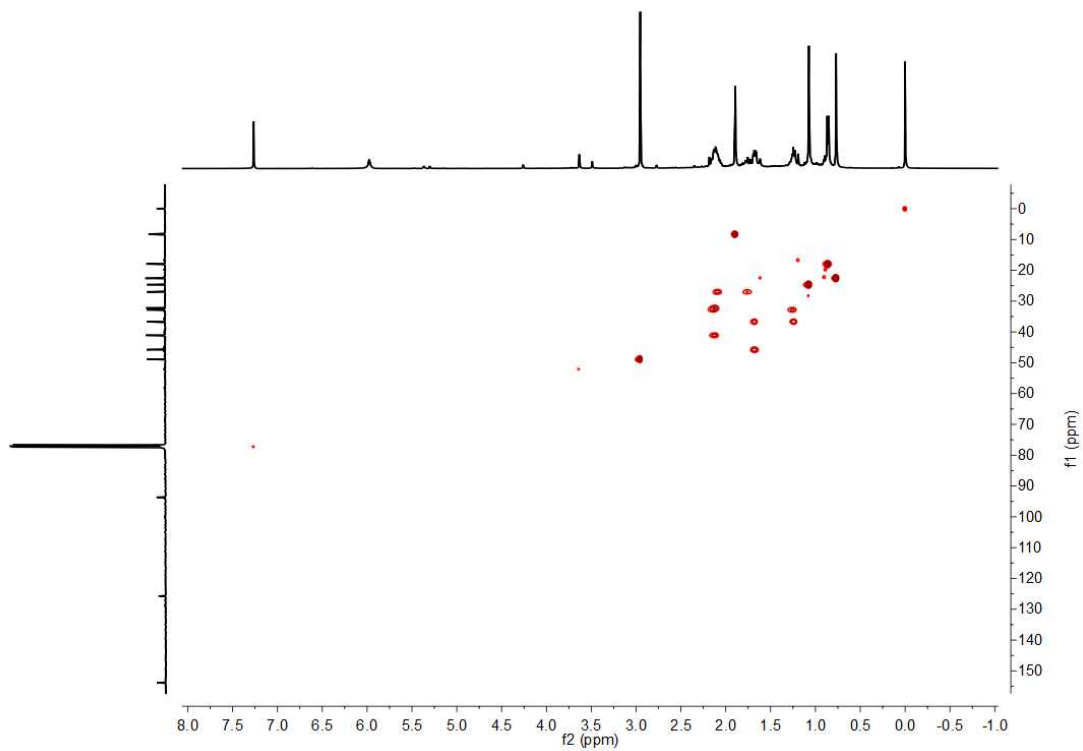

**Fig. 15S** HMQC spectrum of compound **3** in  $\text{CDCl}_3$  at 400 MHz

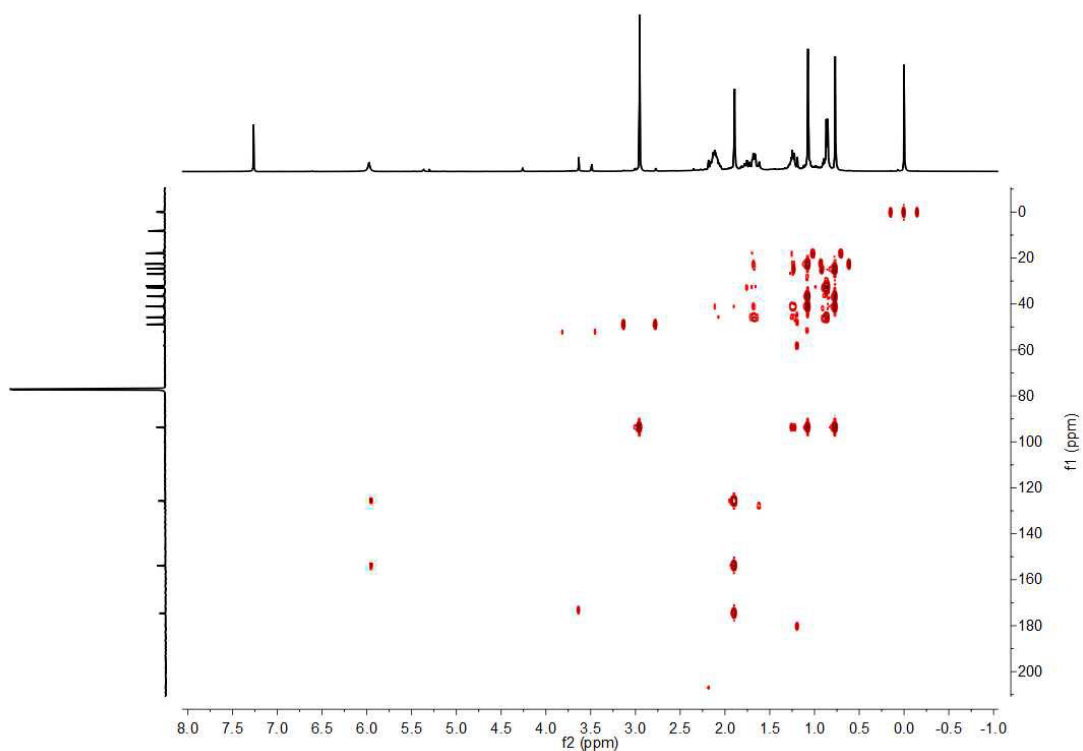

**Fig. 16S** HMBC spectrum of compound **3** in  $\text{CDCl}_3$  at 400 MHz

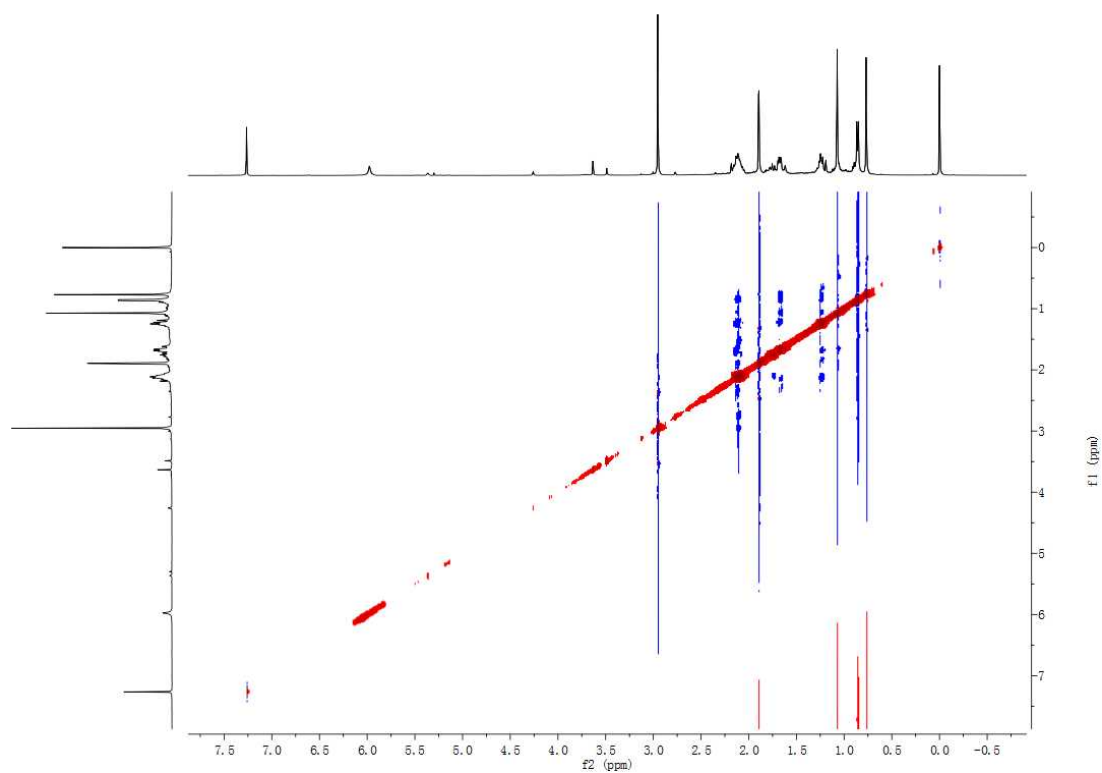

**Fig. 17S** NOESY spectrum of compound **3** in CDCl<sub>3</sub> at 400 MHz

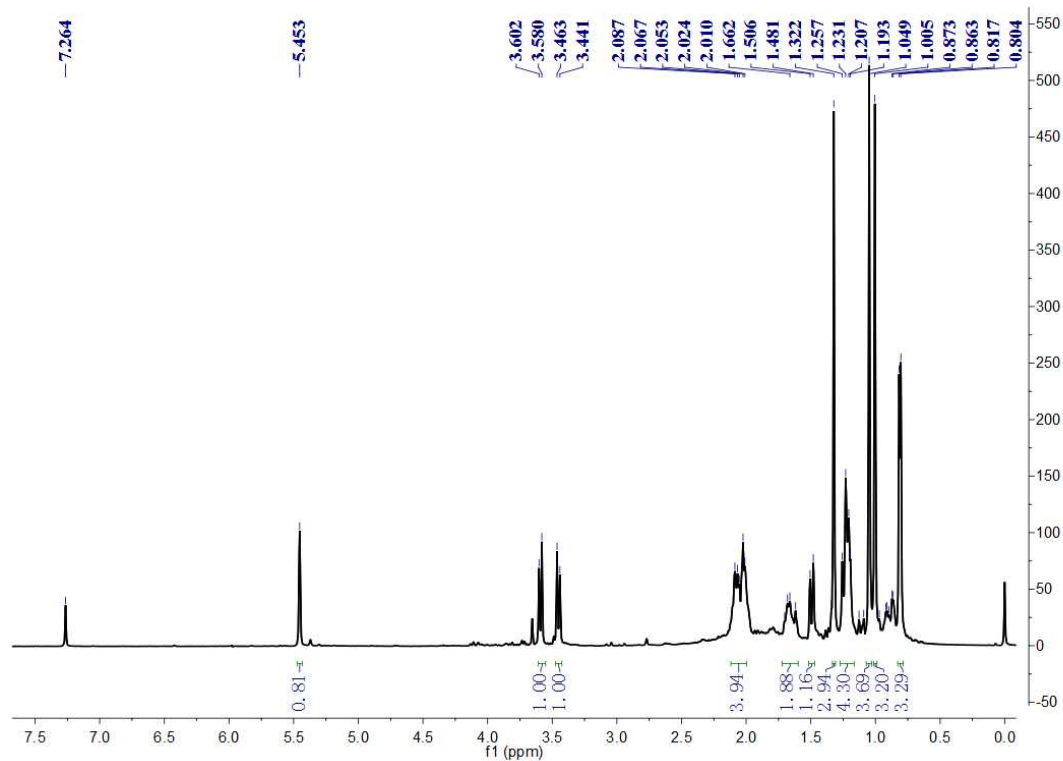

**Fig. 18S** <sup>1</sup>H NMR spectrum of compound **4** in CDCl<sub>3</sub> at 500 MHz

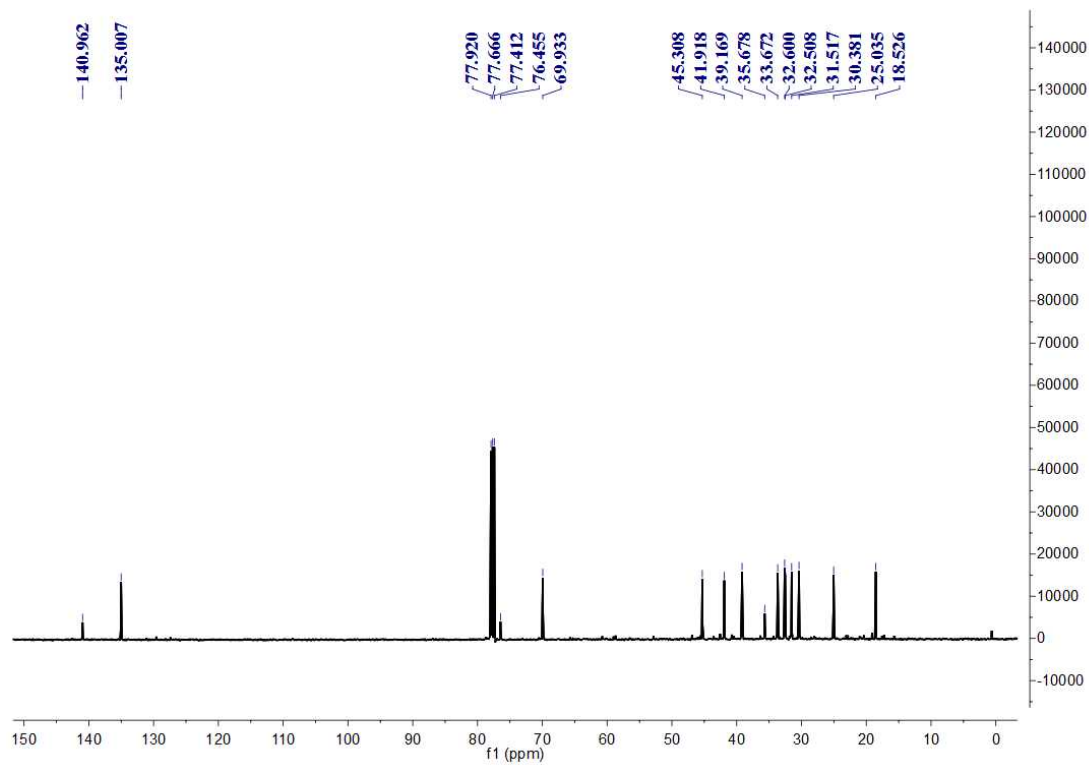

**Fig. 19S**  $^{13}\text{C}$  NMR spectrum of compound **4**  $\text{CDCl}_3$  at 125 MHz

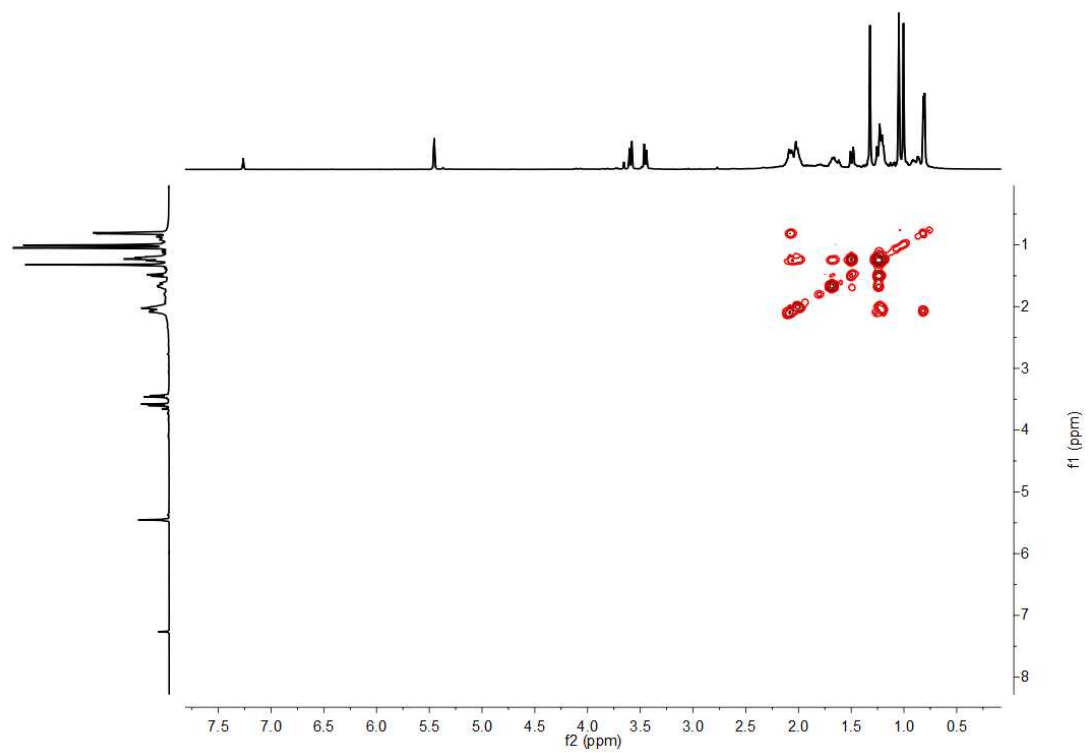

**Fig. 20S**  $^1\text{H}$ - $^1\text{H}$  COSY spectrum of compound **4** in  $\text{CDCl}_3$  at 500 MHz

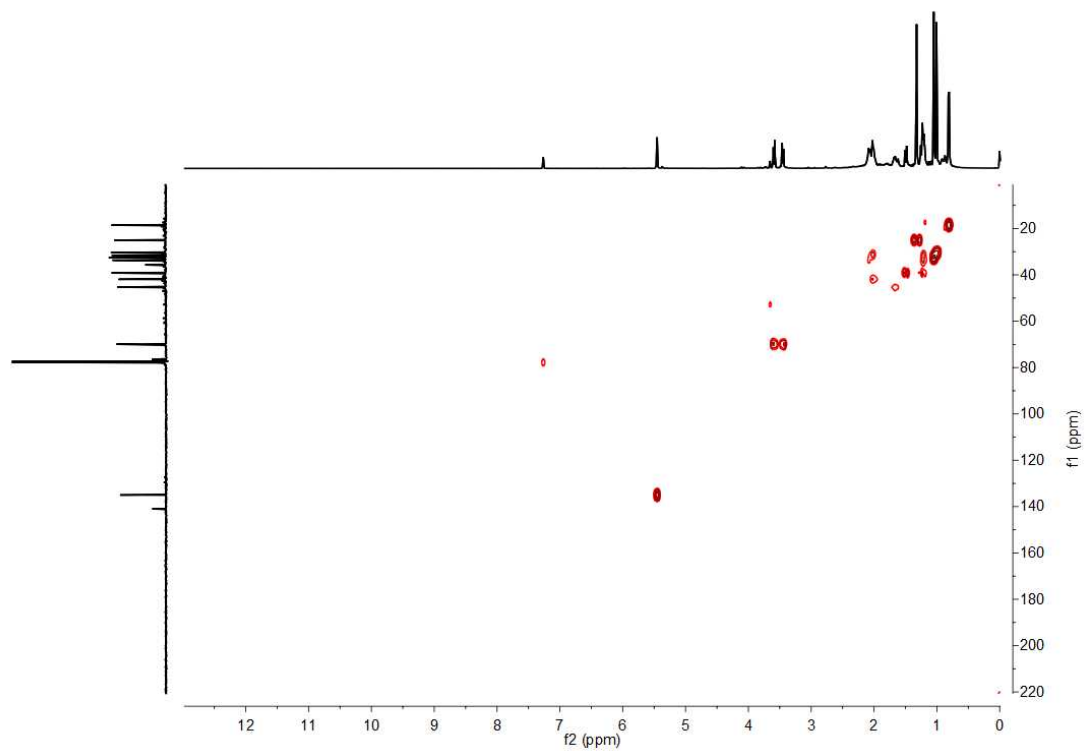

**Fig. 21S** HMQC spectrum of compound **4** in  $\text{CDCl}_3$  at 500 MHz

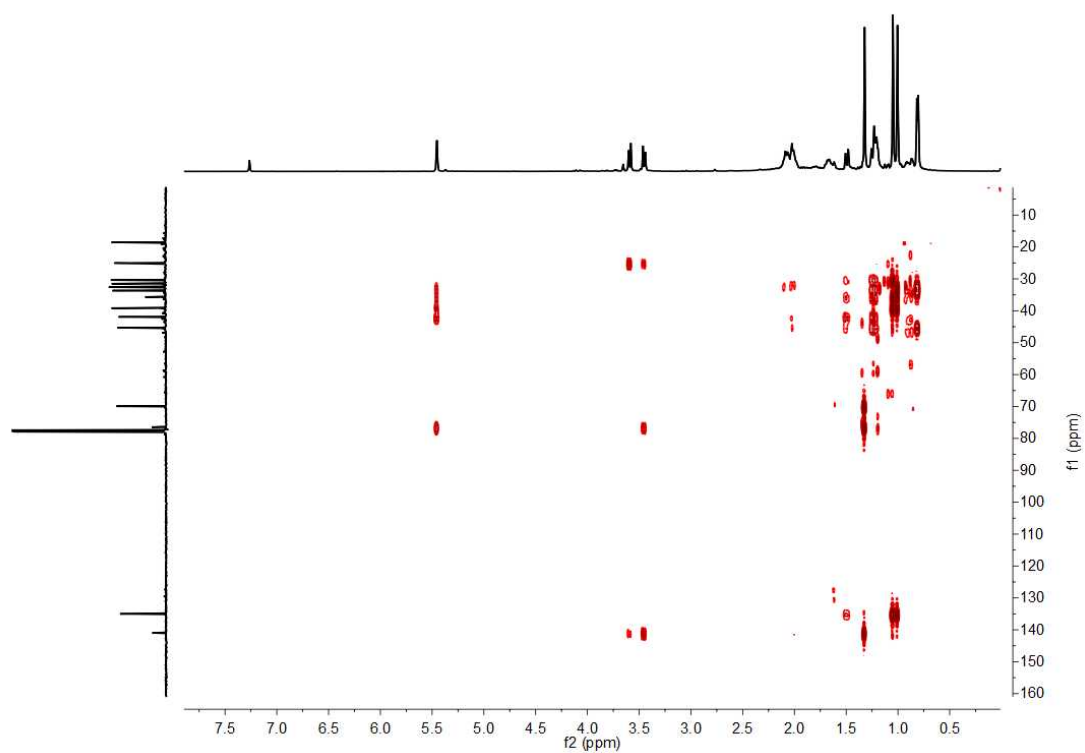

**Fig. 22S** HMBC spectrum of compound **4** in  $\text{CDCl}_3$  at 500 MHz

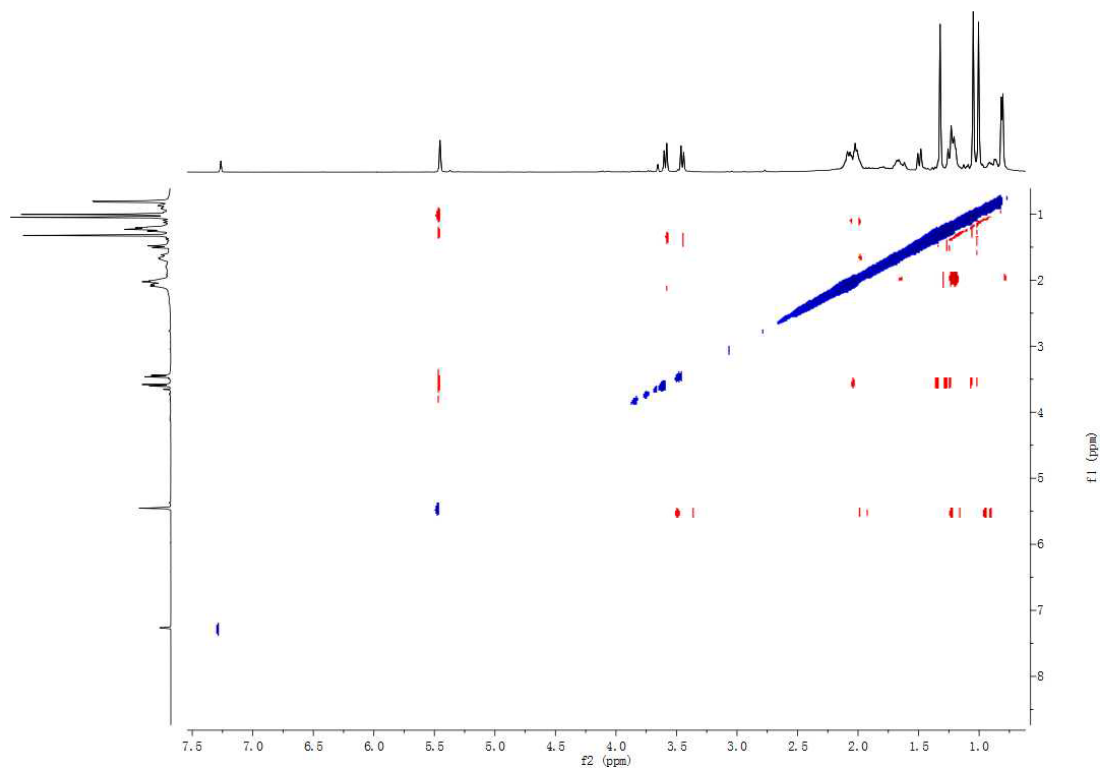

**Fig. 23S** NOESY spectrum of compound **4** in  $\text{CDCl}_3$  at 500 MHz

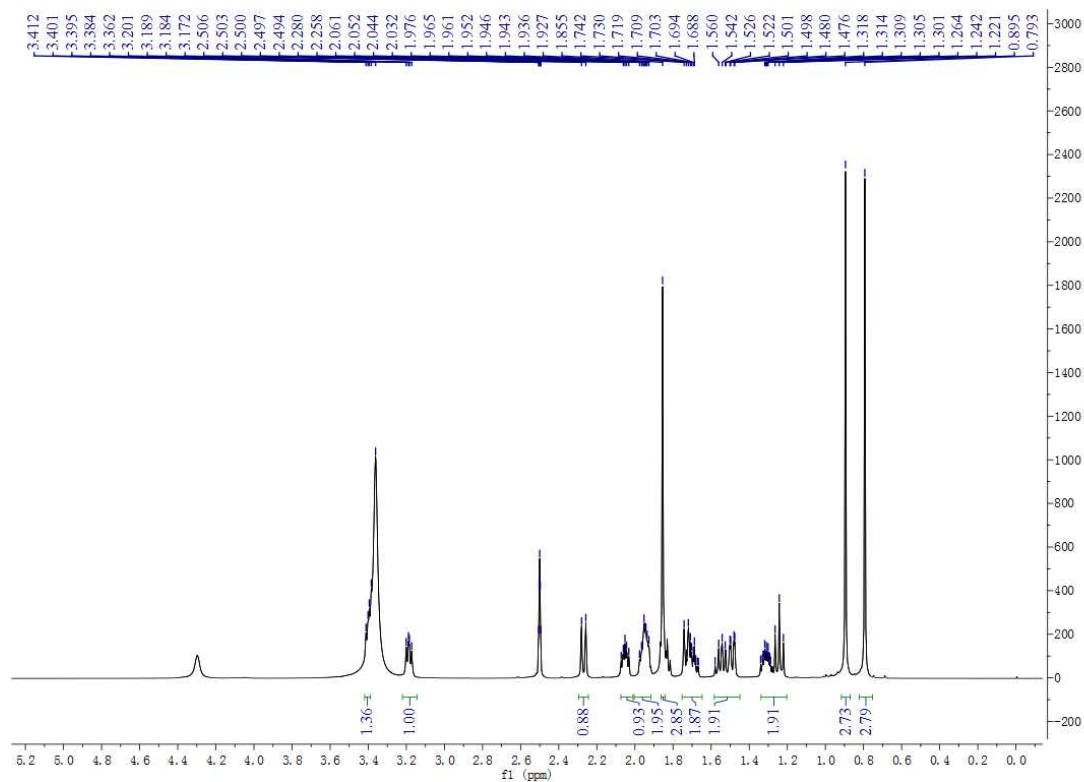

**Fig. 24S**  $^1\text{H}$  NMR spectrum of compound **5** in  $\text{DMSO}-d_6$  at 600 MHz

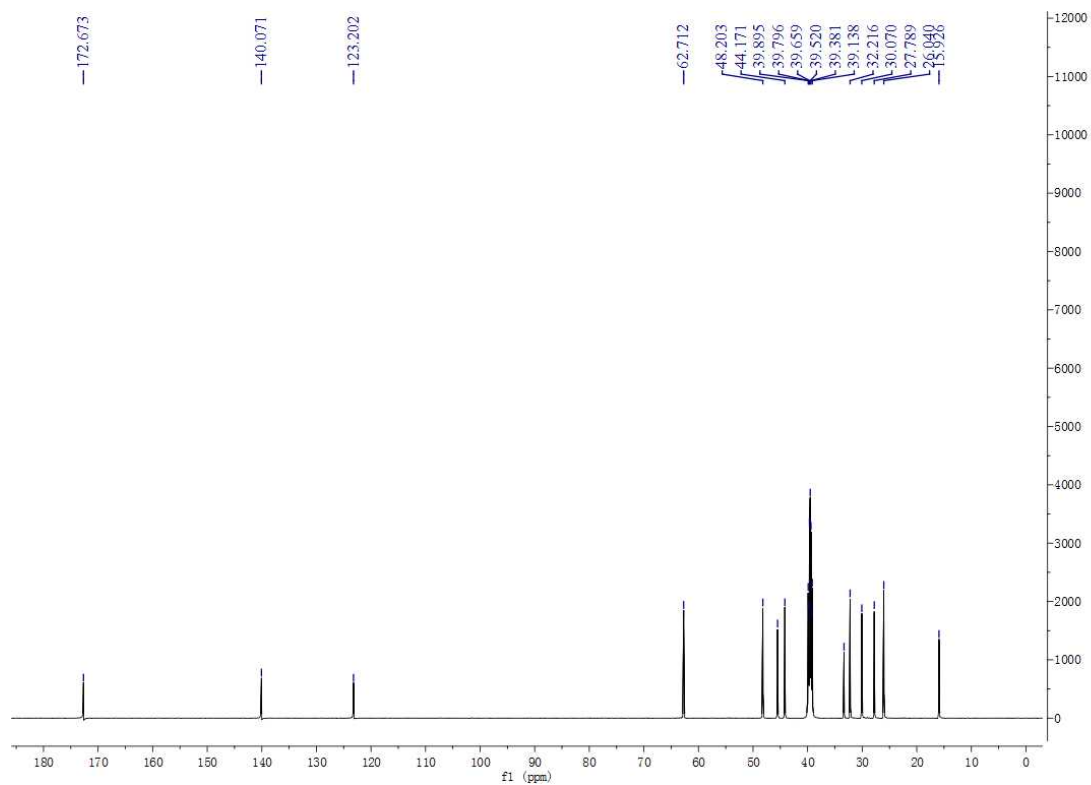

**Fig. 25S**  $^{13}\text{C}$  NMR spectrum of compound **5** in  $\text{DMSO-}d_6$  at 150 MHz

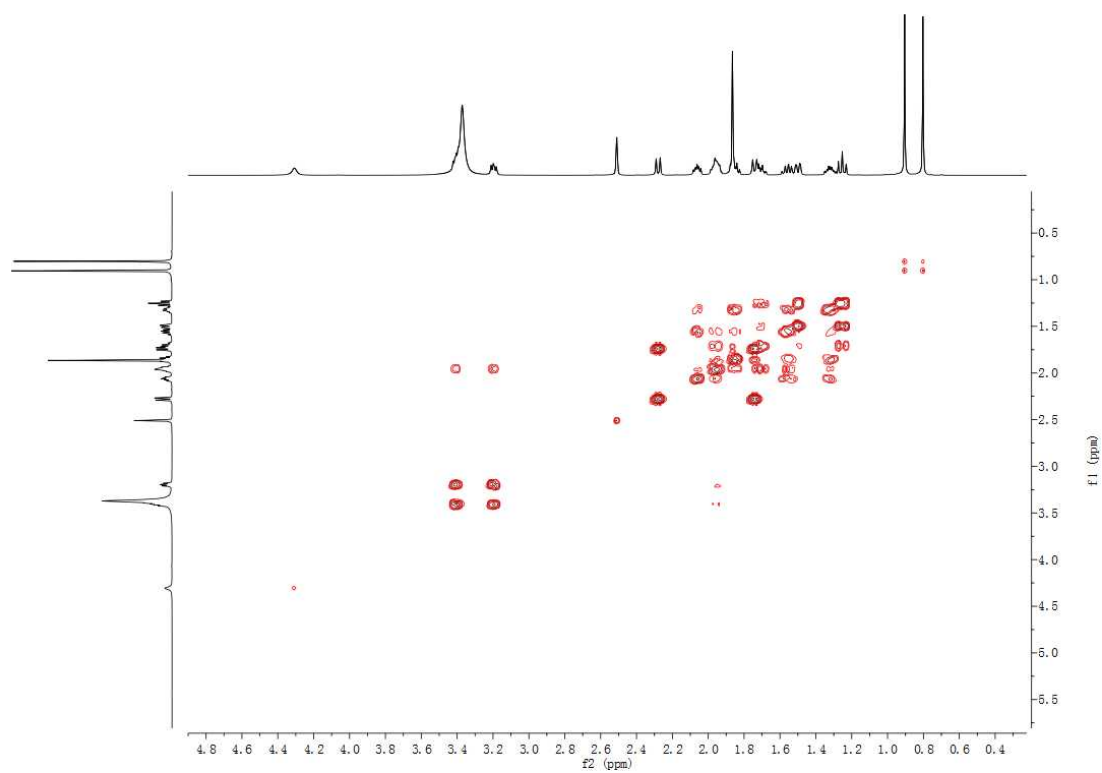

**Fig. 26S**  $^1\text{H-}^1\text{H}$  COSY spectrum of compound **5** in  $\text{DMSO-}d_6$  at 600 MHz



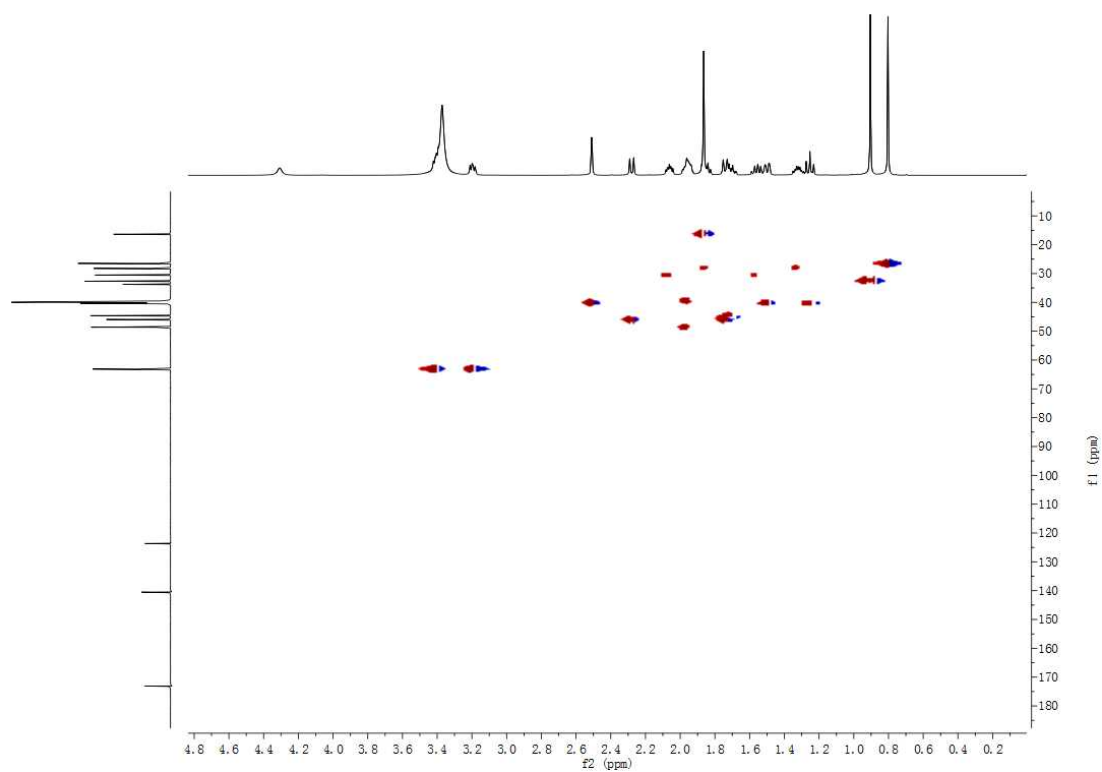

**Fig. 27S** HMQC spectrum of compound **5** in DMSO- $d_6$  at 600 MHz

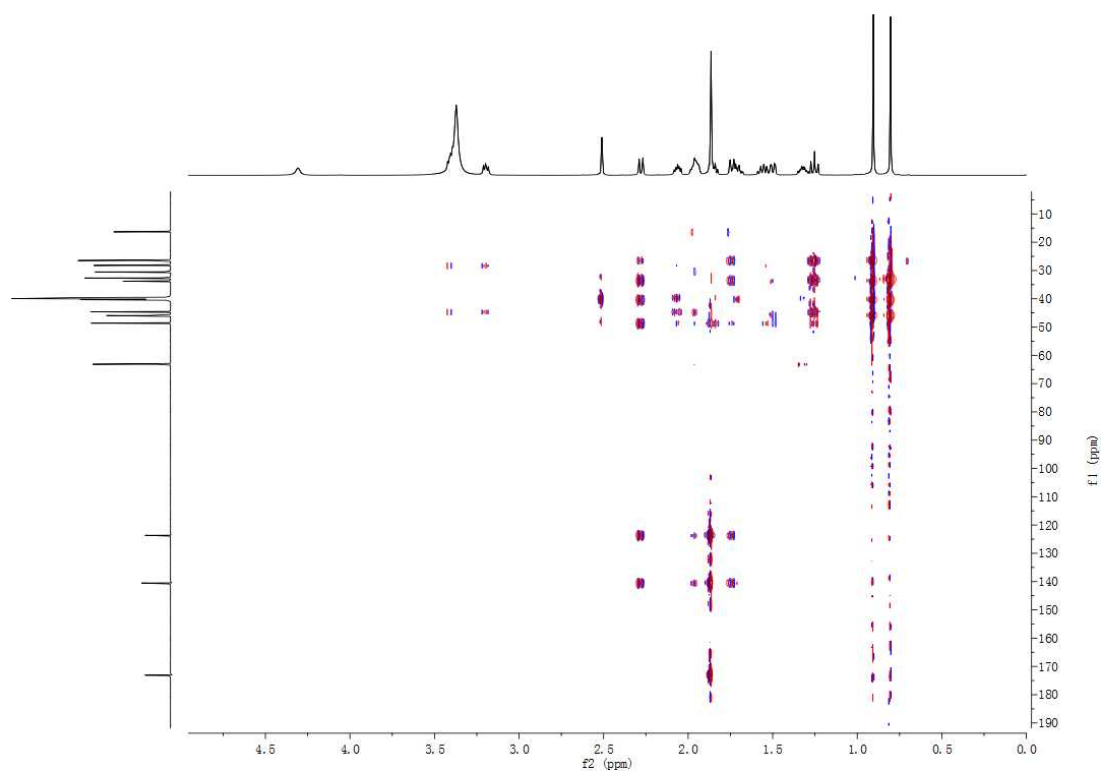

**Fig. 28S** HMBC spectrum of compound **5** in DMSO- $d_6$  at 600 MHz

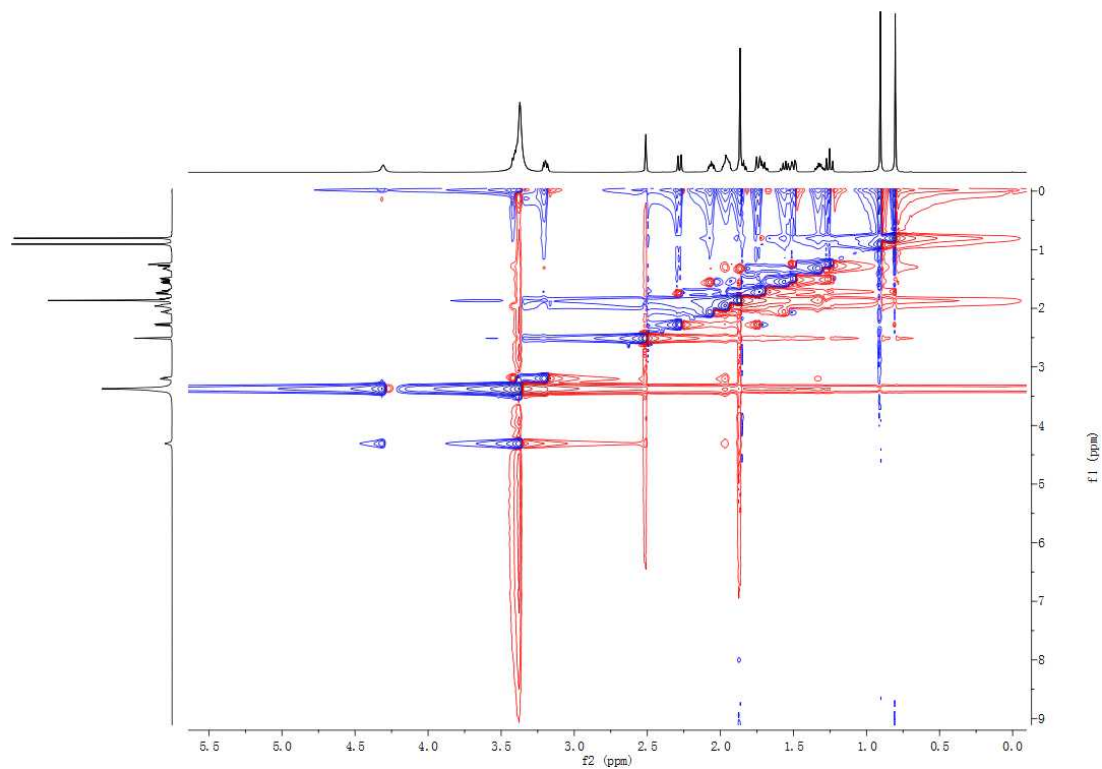

**Fig. 29S** NOESY spectrum of compound **5** in DMSO- $d_6$  at 600 MHz

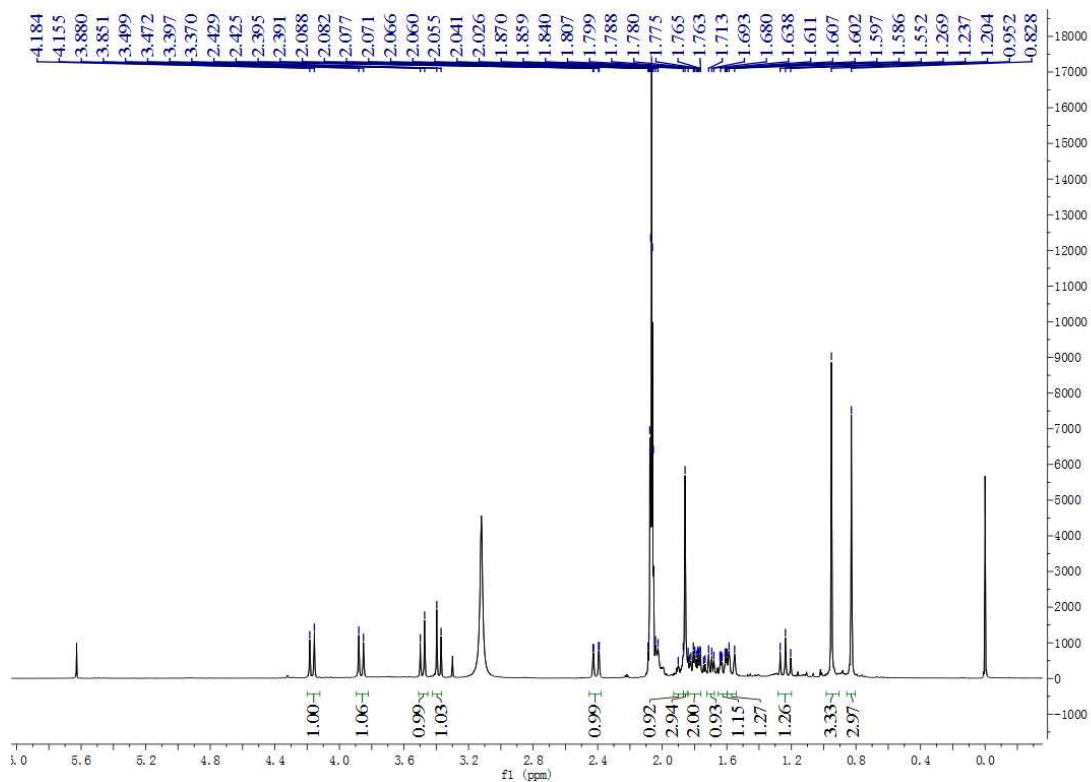

**Fig. 30S**  $^1\text{H}$  NMR spectrum of compound **6** in acetone- $d_6$  at 400 MHz

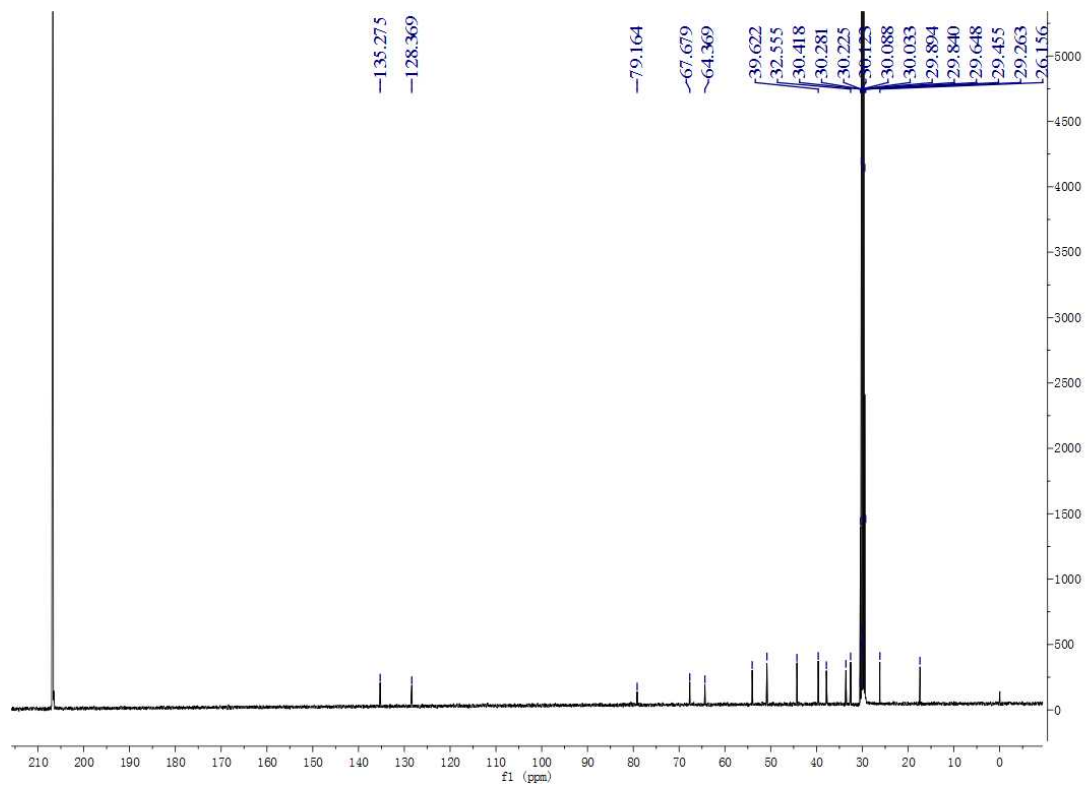

**Fig. 31S**  $^{13}\text{C}$  NMR spectrum of compound **6** in acetone- $d_6$  at 100 MHz

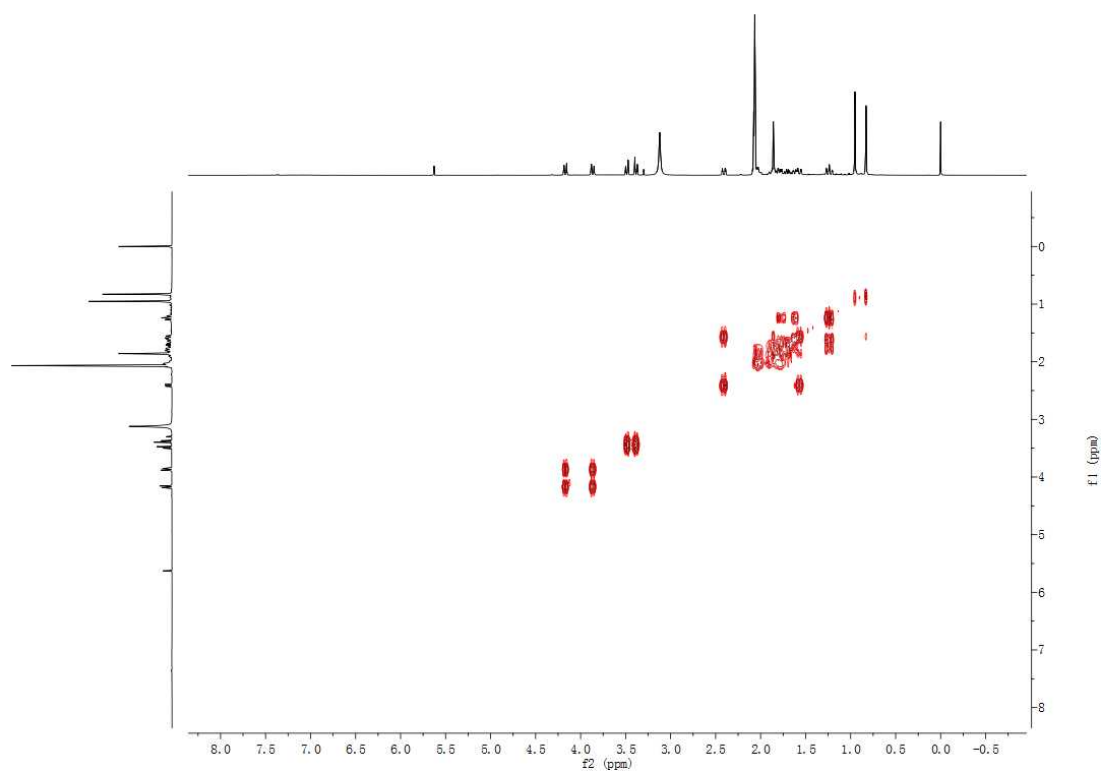

**Fig. 32S**  $^1\text{H}$ - $^1\text{H}$  COSY spectrum of compound **6** in acetone- $d_6$  at 400 MHz

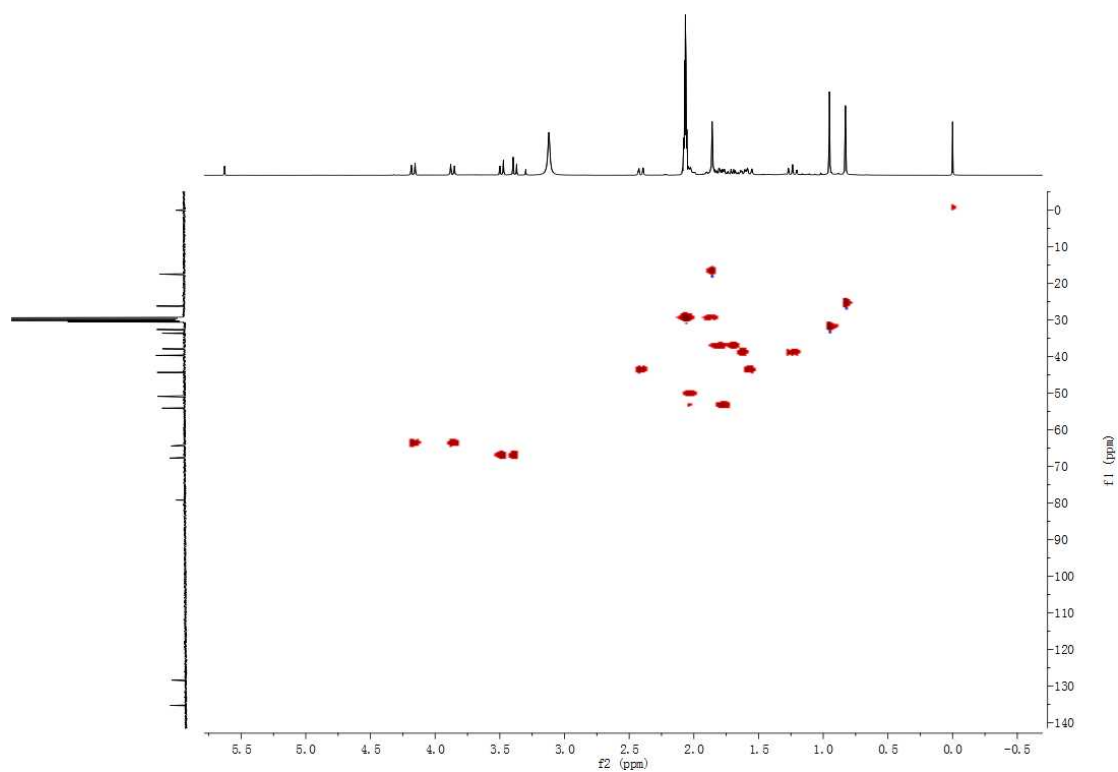

**Fig. 33S** HMQC spectrum of compound **6** in acetone- $d_6$  at 400 MHz

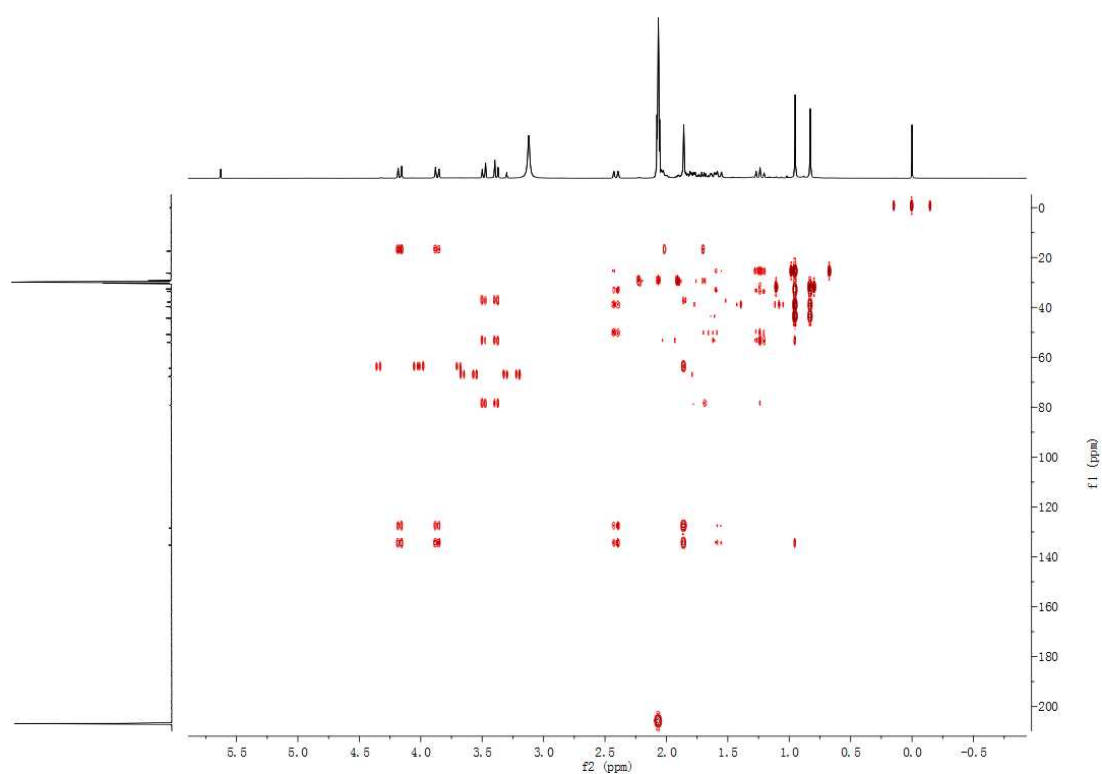

**Fig. 34S** HMBC spectrum of compound **6** in acetone- $d_6$  at 400 MHz

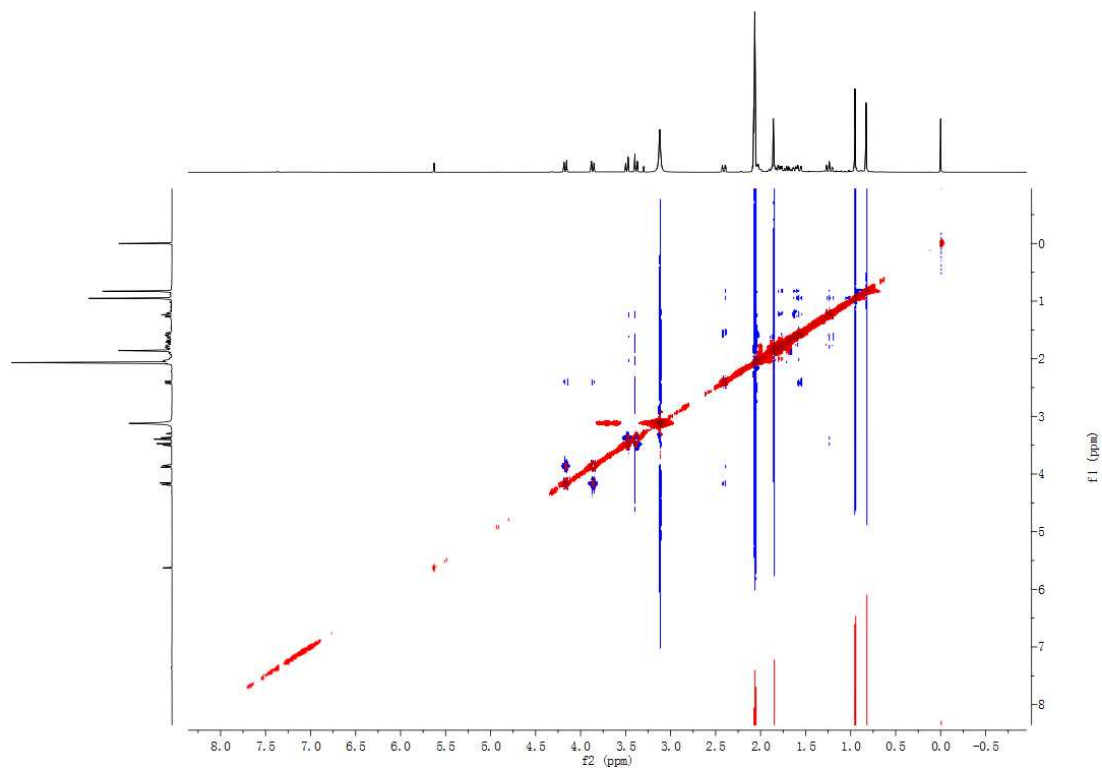

**Fig. 35S** NOESY spectrum of compound **6** in acetone- $d_6$  at 400 MHz

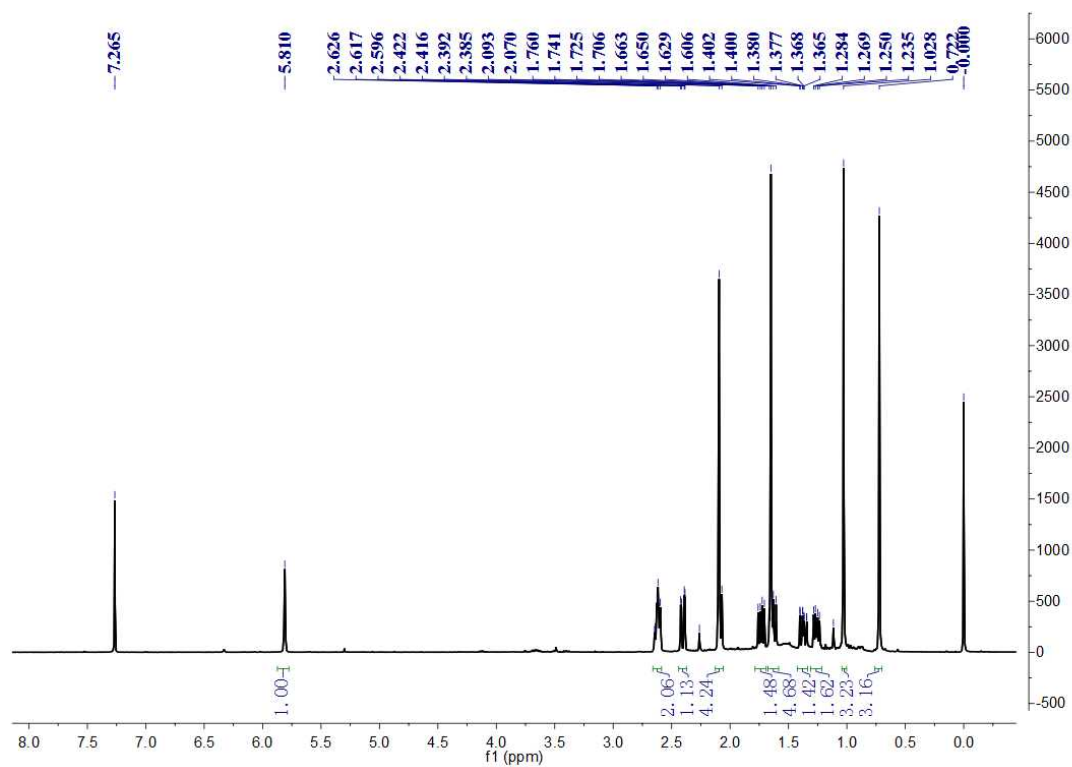

**Fig. 36S**  $^1\text{H}$  NMR spectrum of compound **7** in  $\text{CDCl}_3$  at 400 MHz

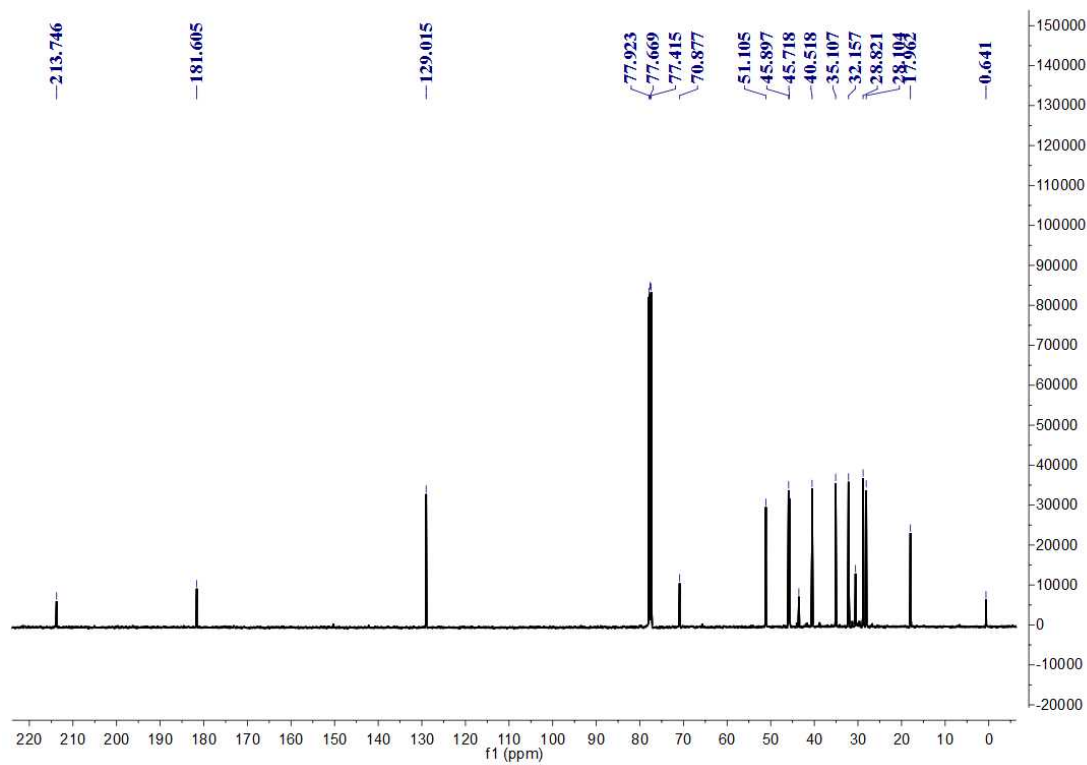

**Fig. 37S**  $^{13}\text{C}$  NMR spectrum of compound **7** in  $\text{CDCl}_3$  at 100 MHz

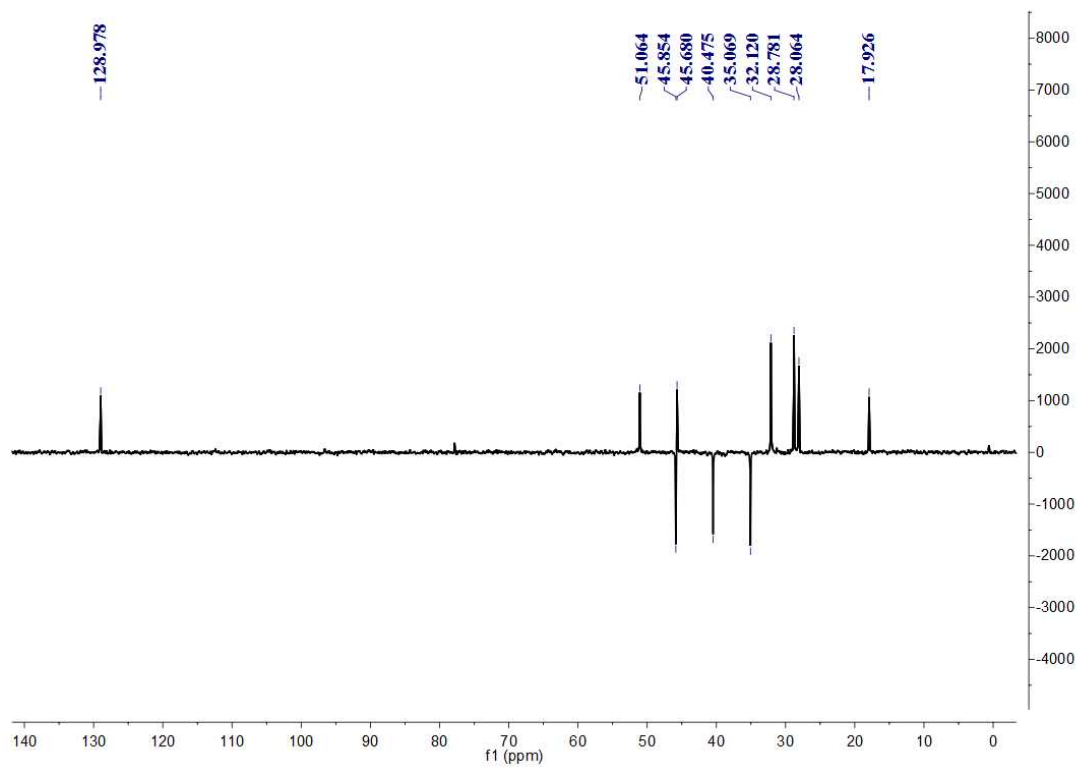

**Fig. 38S** DEPT spectrum of compound **7** in  $\text{CDCl}_3$  at 100 MHz

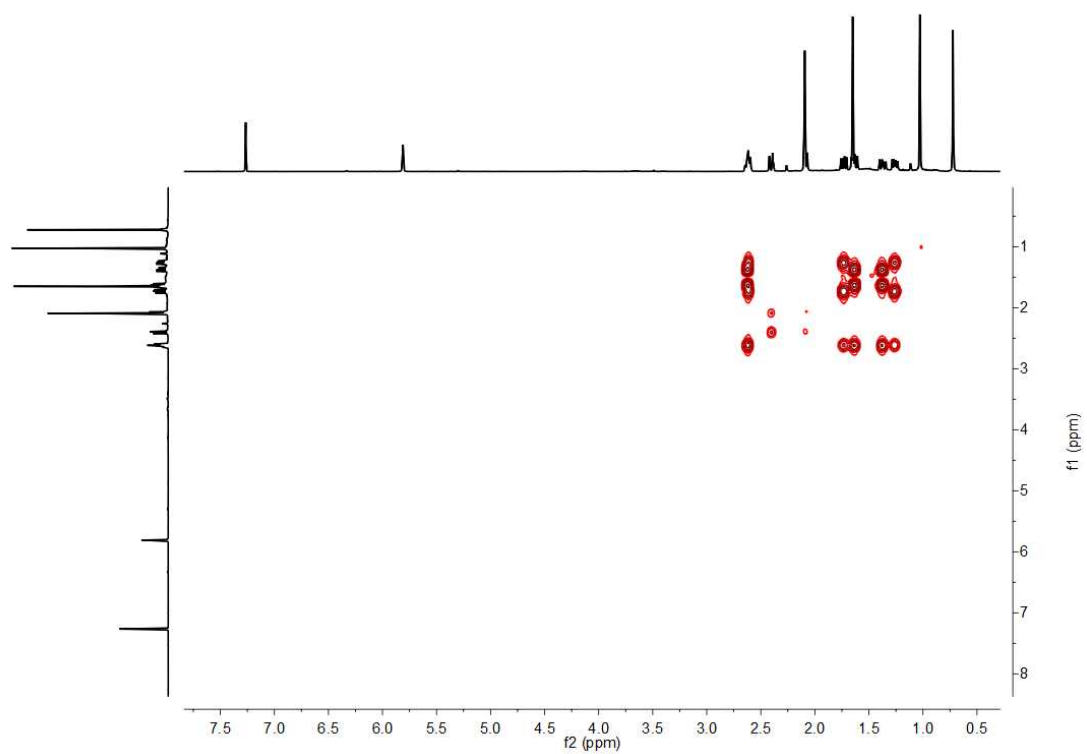

**Fig. 39S**  $^1\text{H}$ - $^1\text{H}$  COSY spectrum of compound **7** in  $\text{CDCl}_3$  at 400 MHz

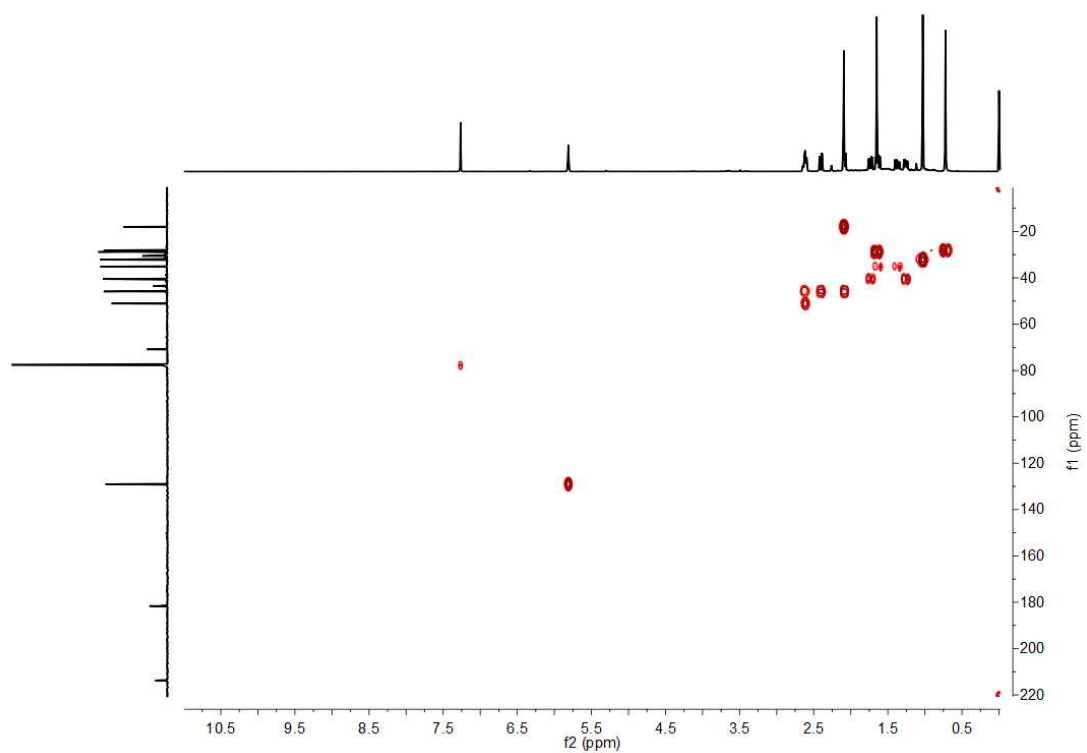

**Fig. 40S** HMQC spectrum of compound **7** in  $\text{CDCl}_3$  at 400 MHz

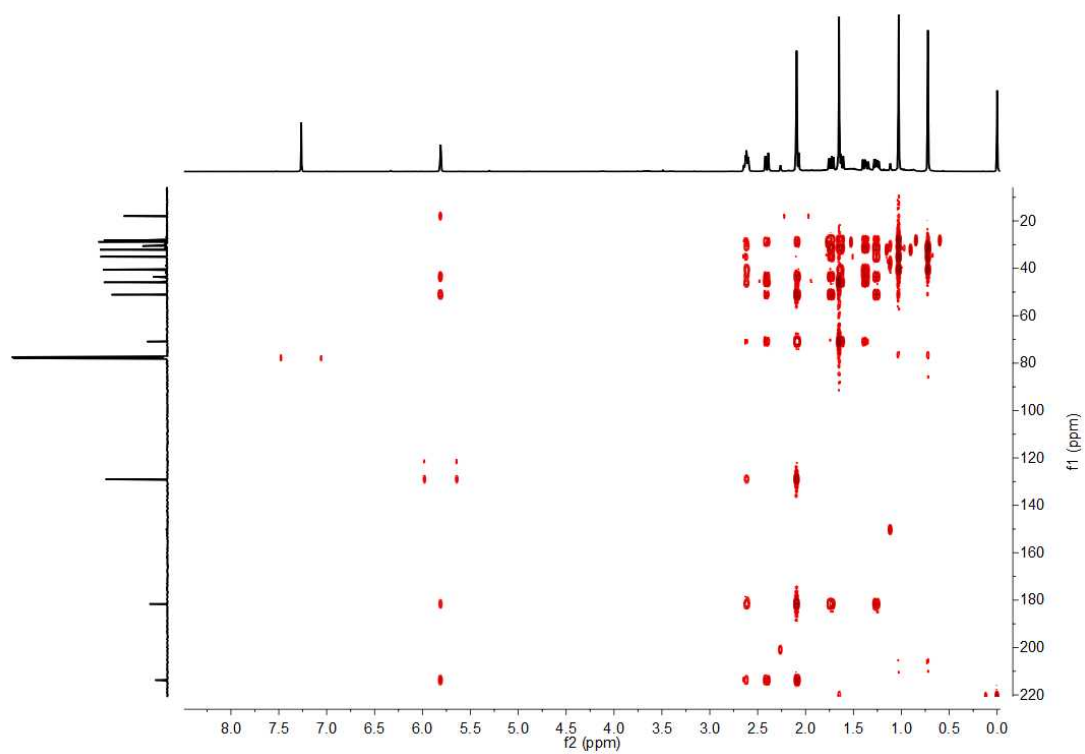

**Fig. 41S** HMBC spectrum of compound **7** in  $\text{CDCl}_3$  at 400 MHz

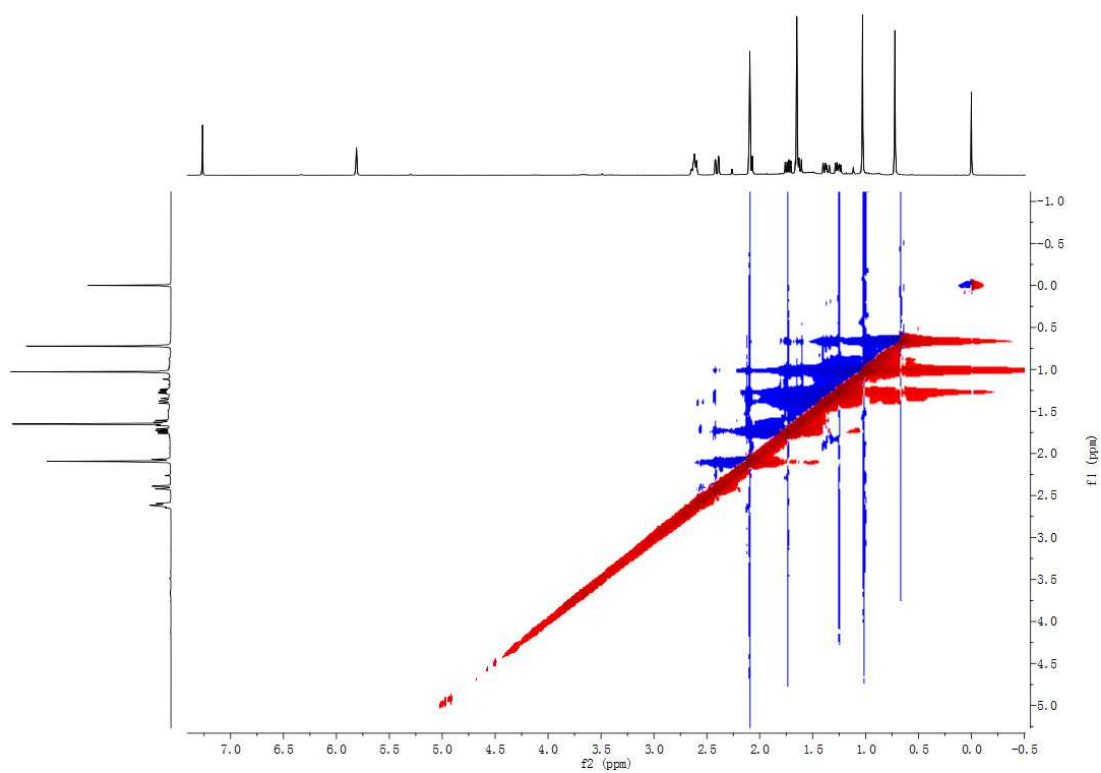

**Fig. 42S** NOESY spectrum of compound **7** in  $\text{CDCl}_3$  at 400 MHz



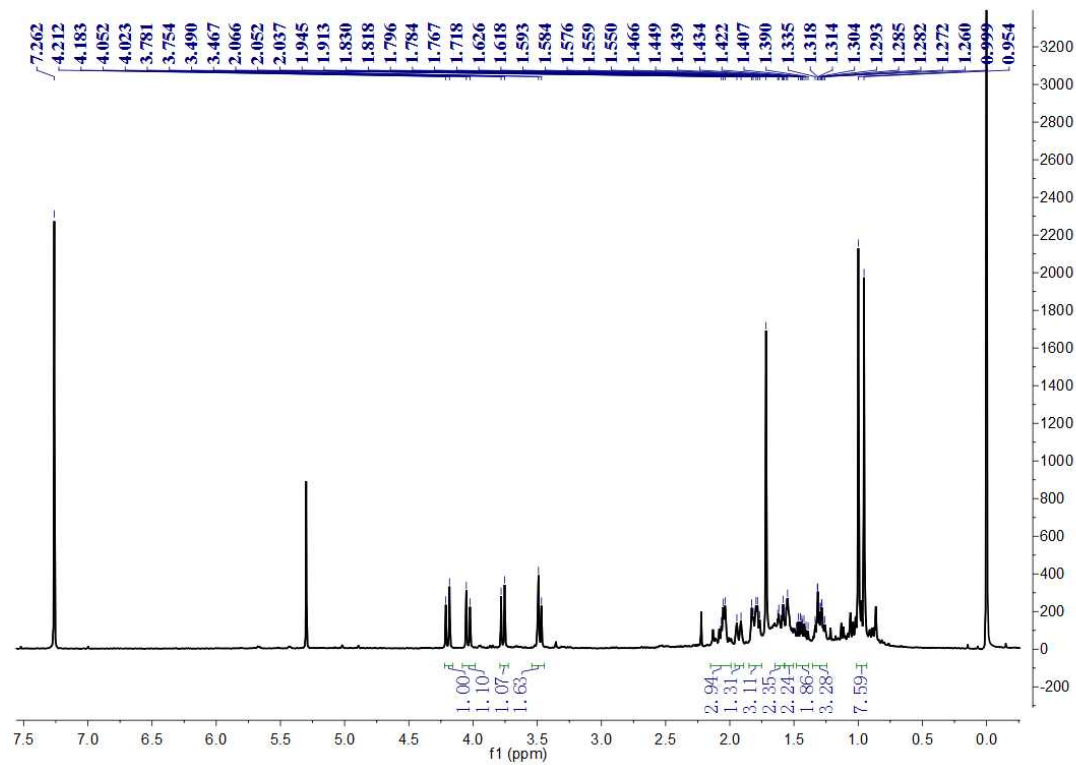

Fig. 43S  $^1\text{H}$  NMR spectrum of compound **8** in  $\text{CDCl}_3$  at 400 MHz

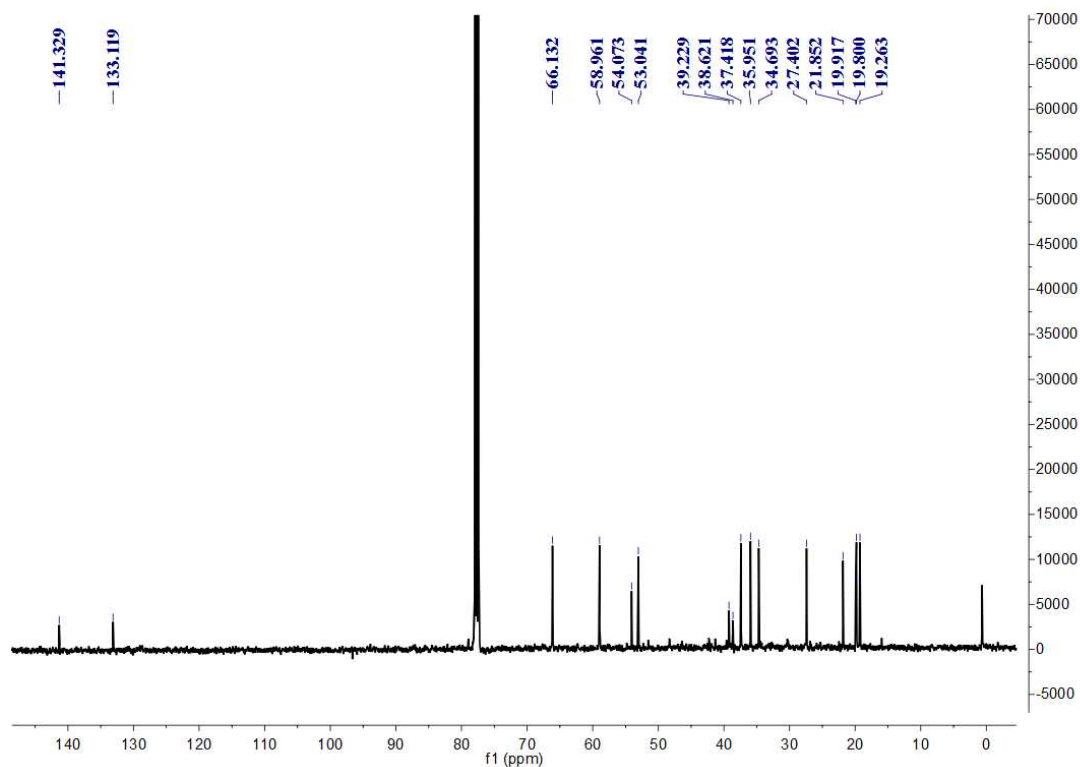

Fig. 44S  $^{13}\text{C}$  NMR spectrum of compound **8** in  $\text{CDCl}_3$  at 100 MHz

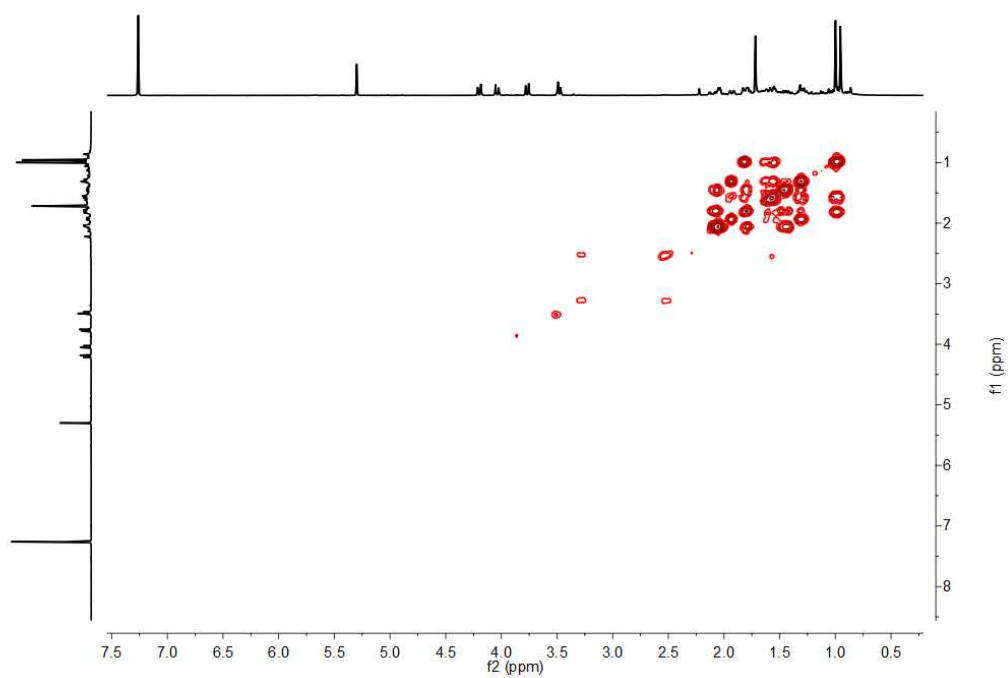

**Fig. 45S**  $^1\text{H}$ - $^1\text{H}$  COSY spectrum of compound **8** in  $\text{CDCl}_3$  at 400 MHz

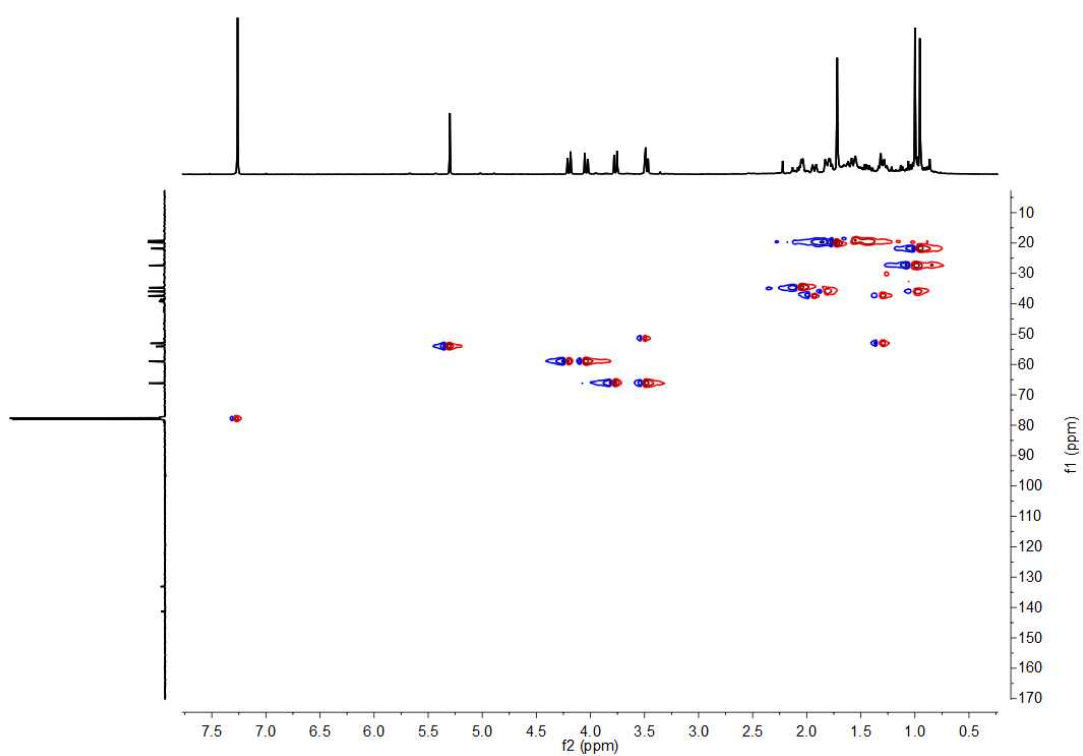

**Fig. 46S** HMQC spectrum of compound **8** in  $\text{CDCl}_3$  at 400 MHz

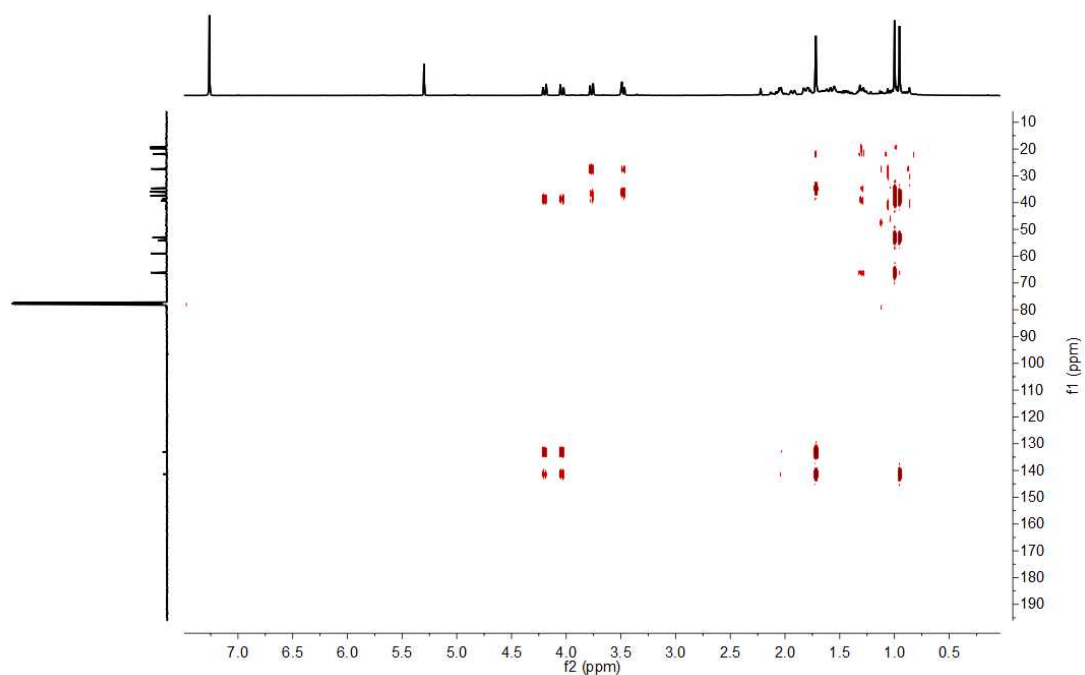

**Fig. 47S** HMBC spectrum of compound **8** in CDCl<sub>3</sub> at 400 MHz

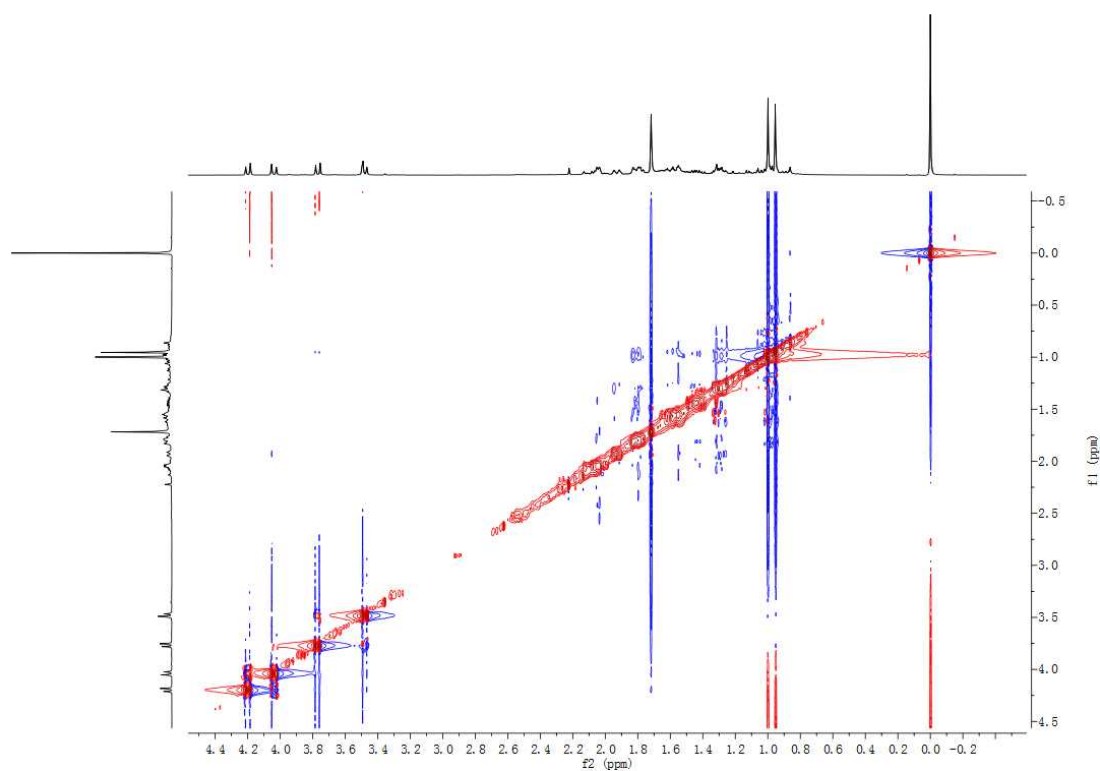

**Fig. 48S** NOESY spectrum of compound **8** in CDCl<sub>3</sub> at 400 MHz

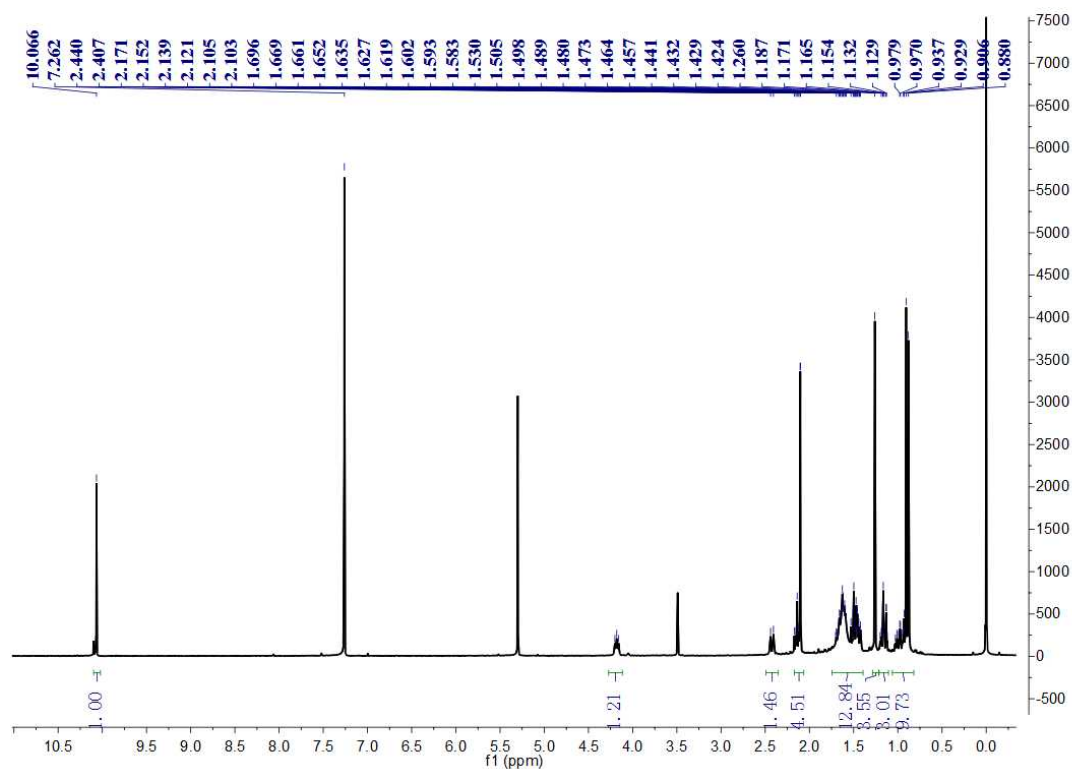

Fig. 49S  $^1\text{H}$  NMR spectrum of compound **9** in  $\text{CDCl}_3$  at 400 MHz

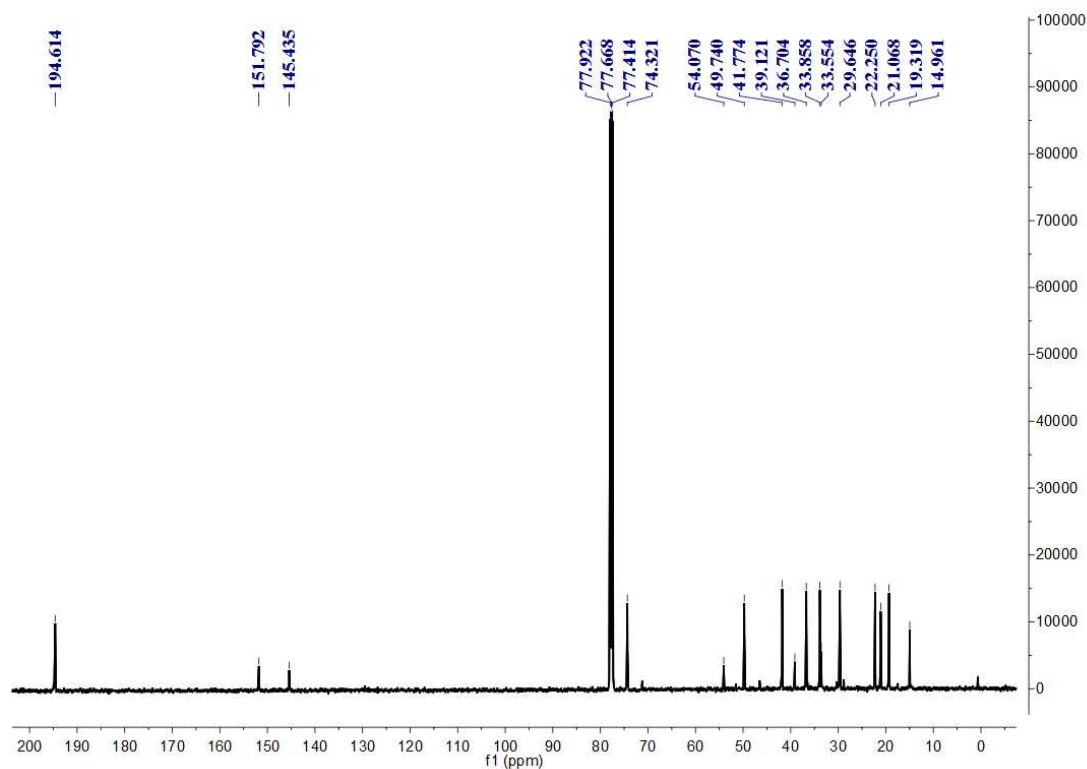

Fig. 50S  $^{13}\text{C}$  NMR spectrum of compound **9** in  $\text{CDCl}_3$  at 100 MHz

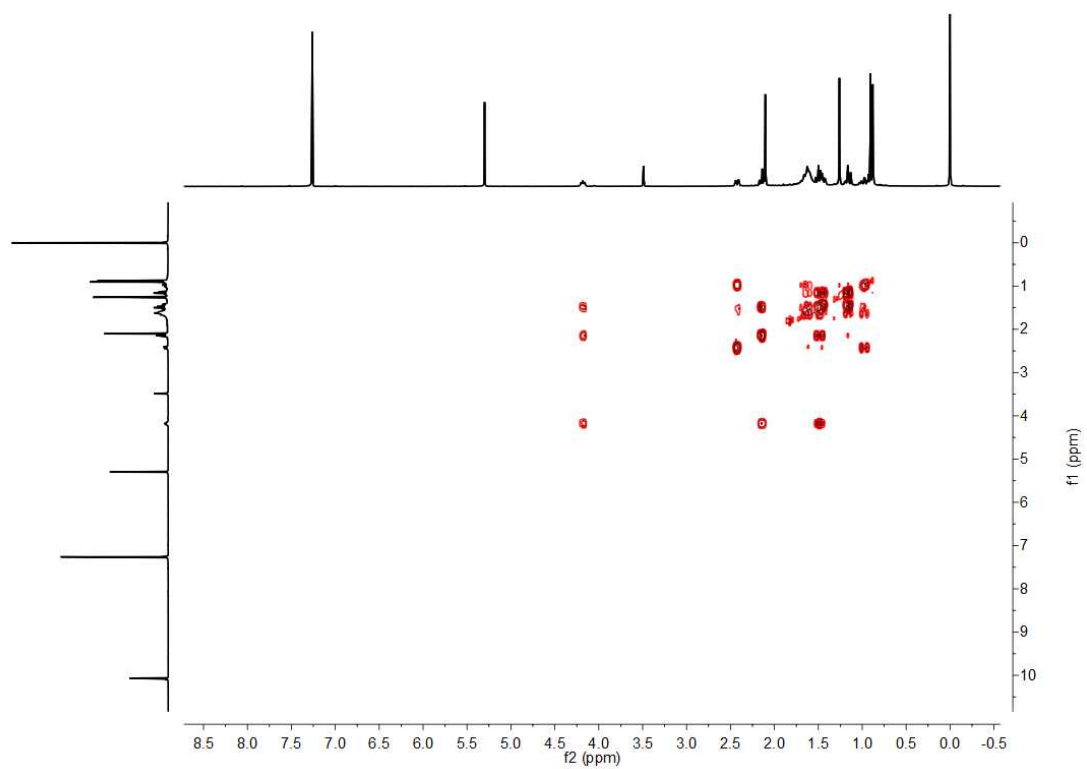

**Fig. 51S**  $^1\text{H}$ - $^1\text{H}$  COSY spectrum of compound **9** in  $\text{CDCl}_3$  at 400 MHz

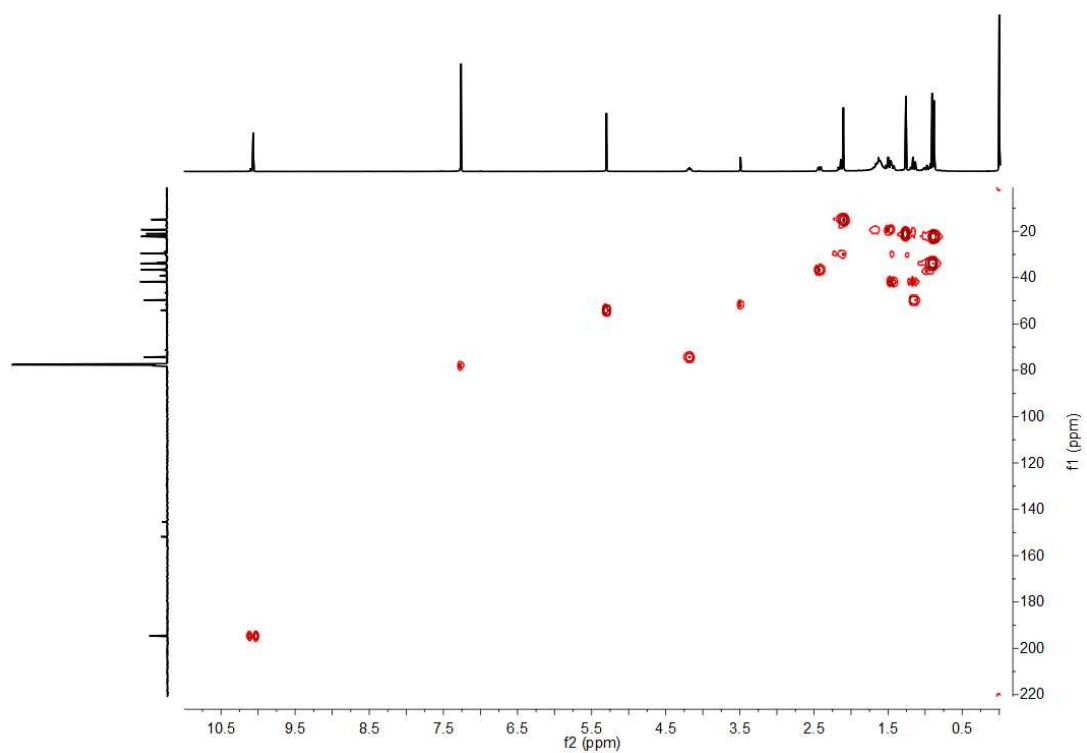

**Fig. 52S** HMQC spectrum of compound **9** in  $\text{CDCl}_3$  at 400 MHz

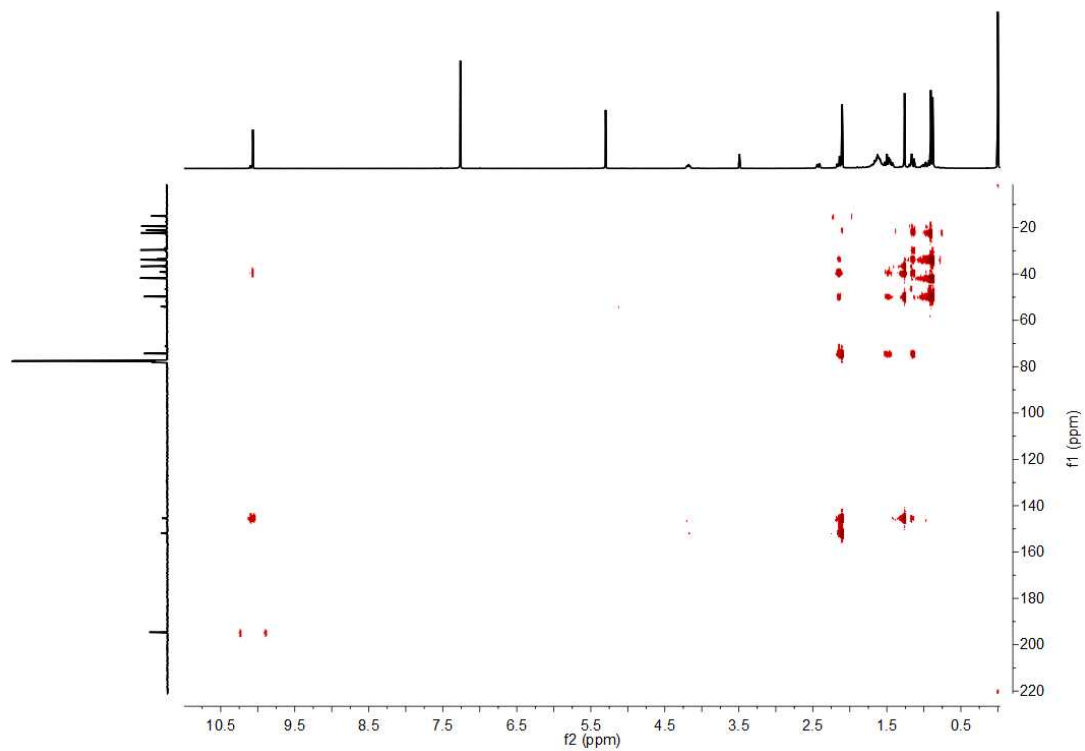

**Fig. 53S** HMBC spectrum of compound **9** in  $\text{CDCl}_3$  at 400 MHz

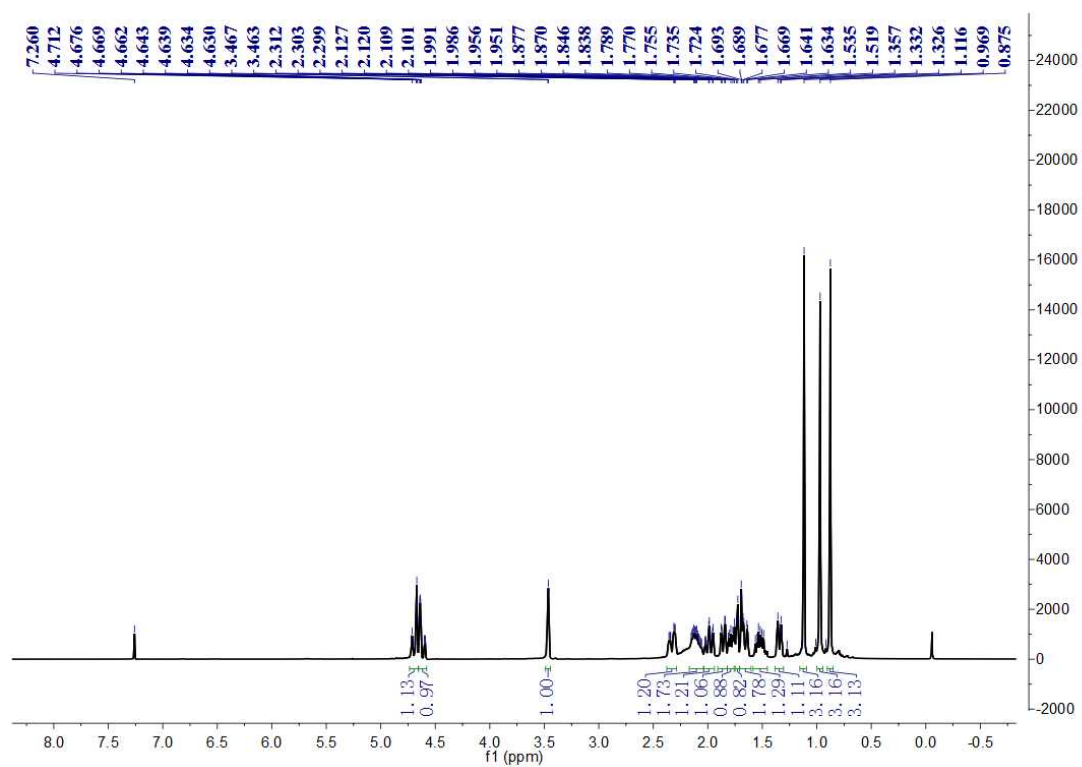

**Fig. 54S**  $^1\text{H}$  NMR spectrum of compound **10** in  $\text{CDCl}_3$  at 400 MHz

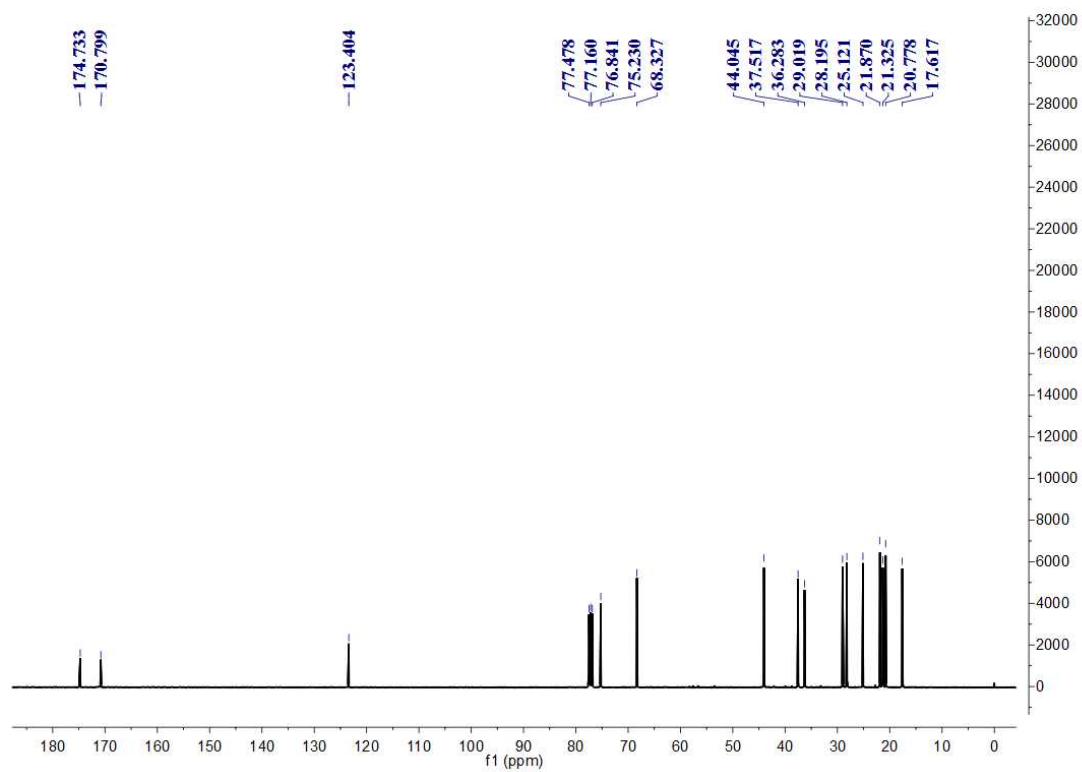

**Fig. 55S**  $^{13}\text{C}$  NMR spectrum of compound **10** in  $\text{CDCl}_3$  at 100 MHz

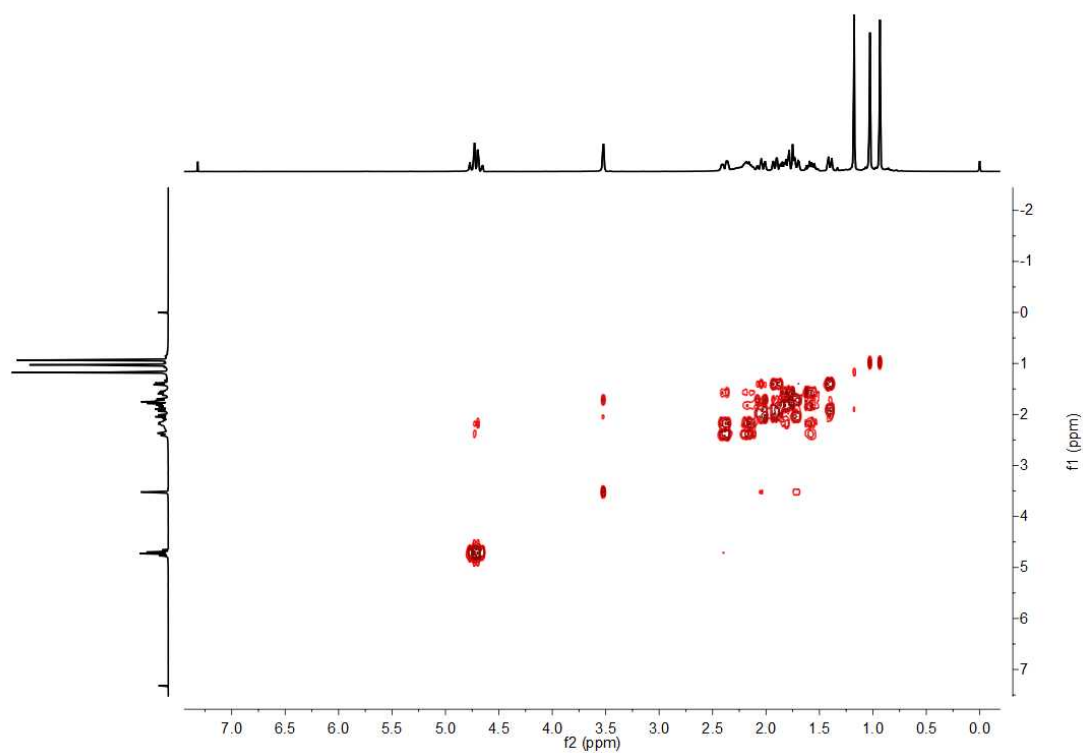

**Fig. 56S**  $^1\text{H}$ - $^1\text{H}$  COSY spectrum of compound **10** in  $\text{CDCl}_3$  at 400 MHz

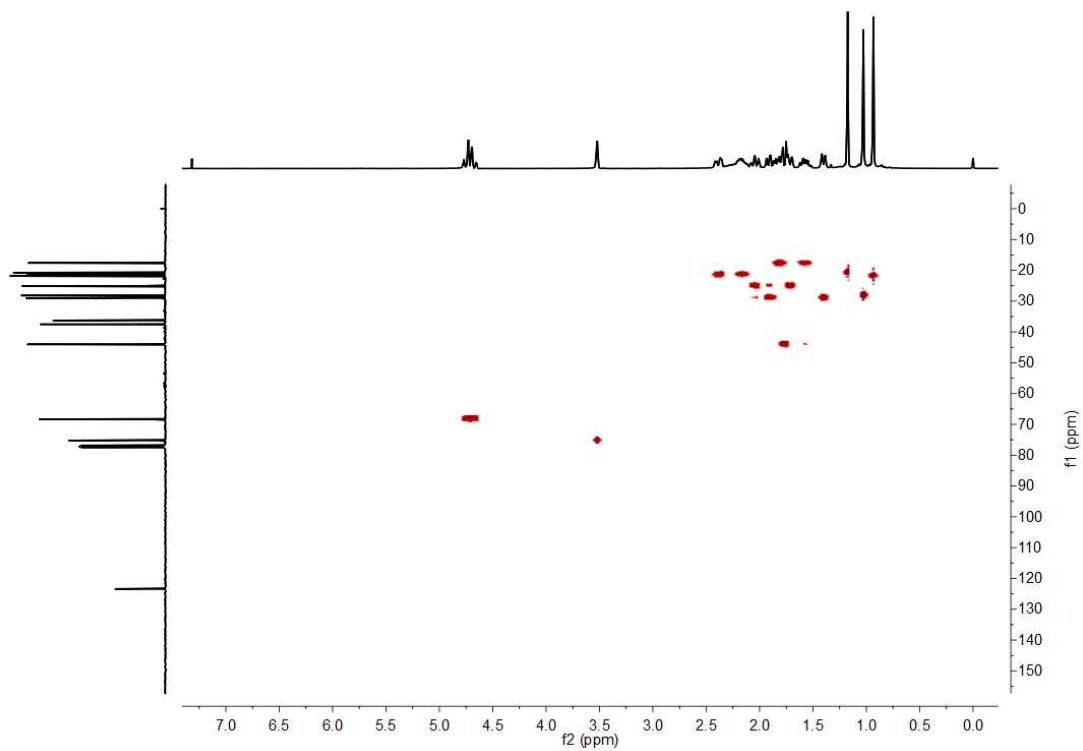

**Fig. 57S** HMQC spectrum of compound **10** in  $\text{CDCl}_3$  at 400 MHz

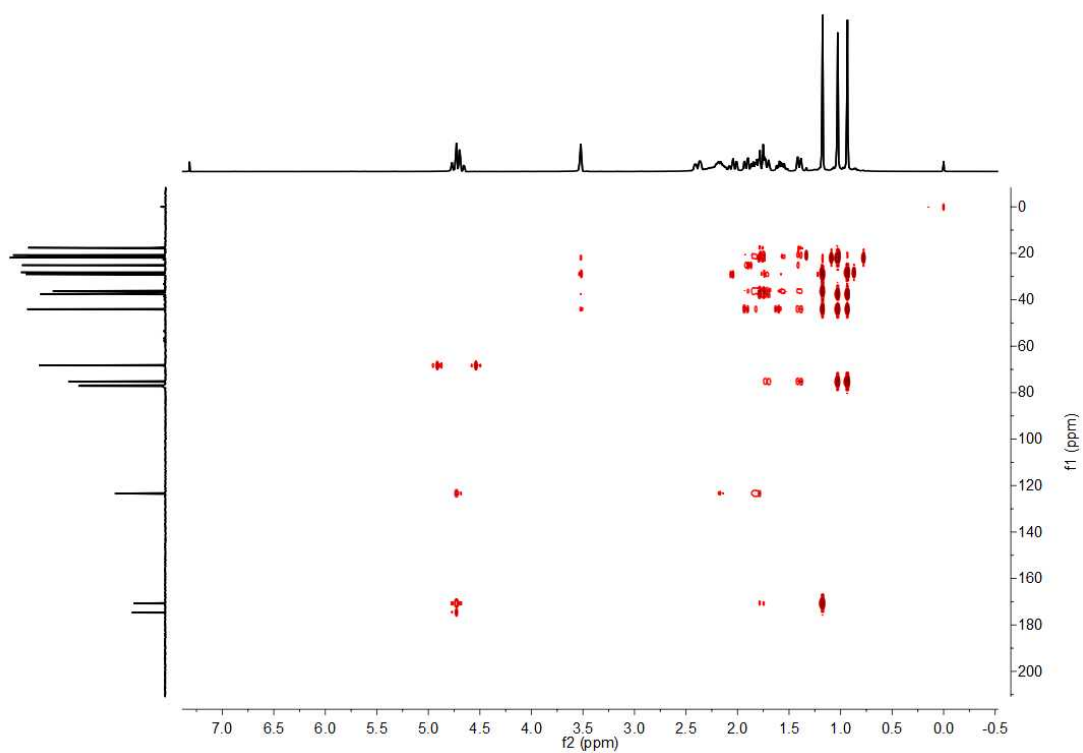

**Fig. 58S** HMBC spectrum of compound **10** in  $\text{CDCl}_3$  at 400 MHz



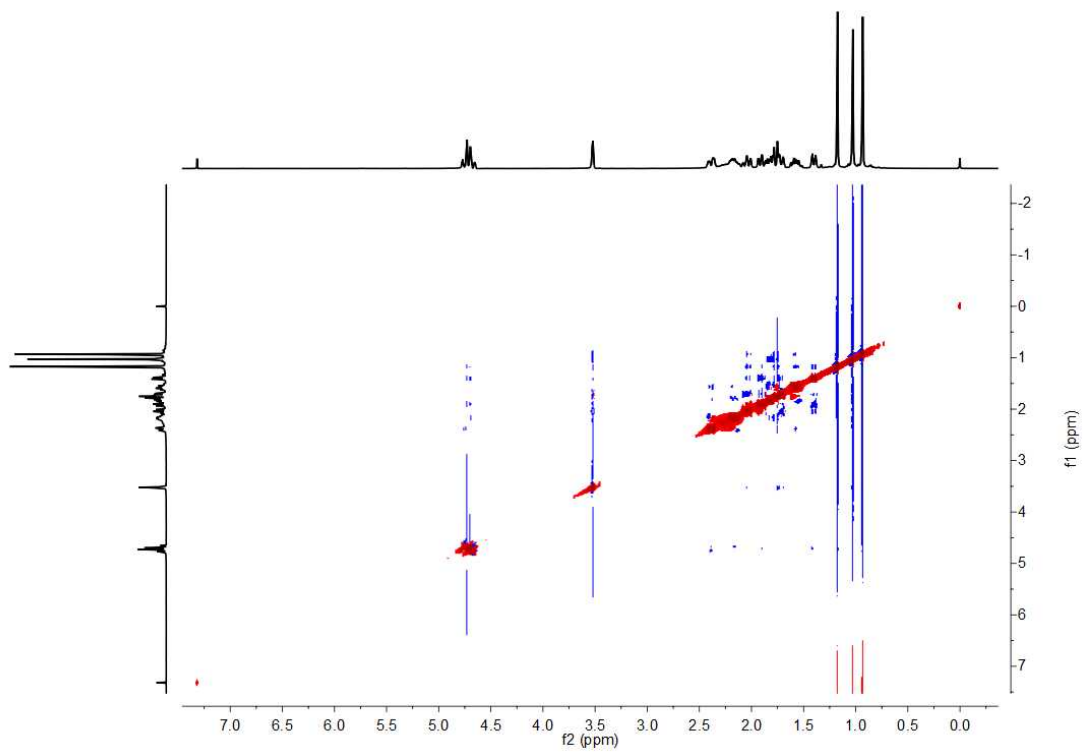

**Fig. 59S** NOESY spectrum of compound **10** in  $\text{CDCl}_3$  at 400 MHz
